# Supplementary material for: Cervical cancer screening in rural Bhutan with the careHPV test on self-collected samples: an ongoing cross-sectional, population-based study (REACH-Bhutan)
Source: PubMed Central journal article supplement — BMJ Open. 2017 Jul 19;7(7):e016309. doi: 10.1136/bmjopen-2017-016309 (PMC5734451; doi:10.1136/bmjopen-2017-016309), 2017-07-19
Supplement: bmjopen-2017-016309.draft_revisions.pdf [file bmjopen-2017-016309.draft_revisions.pdf]

# BMJ Open

## The "REACH-Bhutan" study: cervical cancer screening in rural Bhutan

|                                 |                                                                                                                                                                                                                                                                                                                                                                                                                                                                                                                                                                  |
|---------------------------------|------------------------------------------------------------------------------------------------------------------------------------------------------------------------------------------------------------------------------------------------------------------------------------------------------------------------------------------------------------------------------------------------------------------------------------------------------------------------------------------------------------------------------------------------------------------|
| Journal:                        | <i>BMJ Open</i>                                                                                                                                                                                                                                                                                                                                                                                                                                                                                                                                                  |
| Manuscript ID                   | bmjopen-2017-016309                                                                                                                                                                                                                                                                                                                                                                                                                                                                                                                                              |
| Article Type:                   | Research                                                                                                                                                                                                                                                                                                                                                                                                                                                                                                                                                         |
| Date Submitted by the Author:   | 08-Feb-2017                                                                                                                                                                                                                                                                                                                                                                                                                                                                                                                                                      |
| Complete List of Authors:       | Baussano, Iacopo; International Agency for Research on Cancer,, Tshering, Sangay; Dewanthang Hospital Choden, Tashi; Jigme Dorji Wangchuck National Referral Hospital Lazzarato, Fulvio; International Agency for Research on Cancer, Tenet, Vanessa; International Agency for Research on Cancer, Plummer, Martyn; International Agency for Research on Cancer, Franceschi, Silvia; International Agency for Research on Cancer,, ; Dr Clifford, G; International Agency for Research on Cancer Tshomo, Ugyen; Jigme Dorji Wangchuck National Referral Hospital |
| <b>Primary Subject Heading</b>: | Epidemiology                                                                                                                                                                                                                                                                                                                                                                                                                                                                                                                                                     |
| Secondary Subject Heading:      | Public health                                                                                                                                                                                                                                                                                                                                                                                                                                                                                                                                                    |
| Keywords:                       | Cervical cancer screening, self-collection, careHPV, rural population, Bhutan                                                                                                                                                                                                                                                                                                                                                                                                                                                                                    |
|                                 |                                                                                                                                                                                                                                                                                                                                                                                                                                                                                                                                                                  |

SCHOLARONE™  
Manuscripts

only

1  
2  
3 1 **Title: The “REACH-Bhutan” study: cervical cancer screening in rural Bhutan**  
4  
5  
6 2

7  
8 3 **List of authors:**  
9

10 4 Iacopo Baussano<sup>1\*</sup>, MD, Sangay Tshering<sup>2</sup>, MD, Tashi Choden<sup>3</sup>, BSc, Fulvio Lazzarato<sup>1,4,5</sup>,  
11  
12 5 MSc, Vanessa Tenet<sup>1</sup>, MSc, Martyn Plummer<sup>1</sup>, PhD, Silvia Franceschi<sup>1</sup>, MD, Gary M. Clifford<sup>1</sup>,  
13  
14 6 PhD, Ugyen Tshomo<sup>3</sup>, MD.  
15  
16

17  
18 7 **Author affiliations:**  
19

20  
21 8 <sup>1</sup>International Agency for Research on Cancer, 150 cours Albert Thomas, 69372 Lyon Cedex 08,  
22  
23 9 France.  
24  
25

26 10 <sup>2</sup>Dewanthang Hospital, Samdrup Jongkhar, Bhutan.  
27  
28

29 11 <sup>3</sup>Jigme Dorji Wangchuck National Referral Hospital, Thimphu, Bhutan.  
30  
31

32 12 <sup>4</sup>Unit of Cancer Epidemiology, AOU Città della Salute e della Scienza, Hospital of Turin, Turin,  
33  
34 13 Italy  
35  
36

37  
38 14 <sup>5</sup>Department of Translational Medicine, University of Piemonte Orientale Avogadro, Novara,  
39  
40 15 Italy  
41  
42

43 16 **Brief title:** Cervical cancer screening in rural Bhutan  
44  
45  
46 17

47  
48 18 \*Address for correspondence: Dr. Iacopo Baussano, International Agency for Research on  
49  
50 19 Cancer, 150 cours Albert Thomas, 69372 Lyon CEDEX 08, France; Tel.: +33-472738048; Fax:  
51  
52 20 +33-472738345; email: baussanoi@iarc.fr  
53  
54  
55  
56  
57  
58  
59  
60

1  
2  
3 21 Main text word count: approx. 2425 (limit 4000 words).  
4

5 22 Abstract word count: 298 words (300 words)  
6

7  
8 23 Number of references: 19.  
9

10 24 Tables: 2; Figures: 4  
11

12 25 Appendix: 1 including 1 figure  
13

14  
15 26  
16  
17  
18  
19  
20  
21  
22  
23  
24  
25  
26  
27  
28  
29  
30  
31  
32  
33  
34  
35  
36  
37  
38  
39  
40  
41  
42  
43  
44  
45  
46  
47  
48  
49  
50  
51  
52  
53  
54  
55  
56  
57  
58  
59  
60

For peer review only

1  
2  
3 **27 Abstract (words=298)**  
4

5 **28 Objectives.** The Bhutanese Screening Programme recommends a Pap smear every three years for  
6  
7  
8 **29** women aged 25–65 years and coverage ranges from 20% to 60%, being especially challenging in  
9  
10  
11 **30** rural settings. The “REACH-Bhutan” study was conducted to assess the feasibility and outcomes  
12  
13 **31** of a novel approach to cervical cancer screening in rural Bhutan.

14 **32 Design.** Cross-sectional, population-based, study of cervical cancer screening based on the  
15  
16  
17 **33** careHPV test on self-collected samples.

18  
19 **34 Setting.** Women were recruited in rural primary health care centres, i.e. Basic Health Units  
20  
21  
22 **35** (BHU), across Bhutan.

23  
24 **36 Participants.** Overall, 3,648 women aged 30–60 years were invited from 15 BHUs differing in  
25  
26  
27 **37** accessibility, size, and ethnic composition of the population.

28  
29 **38 Interventions.** Participants provided a self-collected cervico-vaginal sample and were  
30  
31  
32 **39** interviewed. Samples were tested using careHPV in Thimphu (the Bhutanese capital) referral  
33  
34 **40** laboratory.

35  
36 **41 Main outcome measures.** Screening participation by geographic area, centre, age, and travelling  
37  
38  
39 **42** time. Previous screening history and careHPV-positivity by selected characteristics of the  
40  
41  
42 **43** participants.

43  
44 **44 Results.** In April/May 2016, 2590 women (median age: 41 years) were enrolled. Study  
45  
46  
47 **45** participation was 71% and significantly heterogeneous by BHU (range: 31%–96%). Participation  
48  
49  
50 **46** decreased with increase in age (81% in 30–39 year-old women but only 59% in  $\geq 50$  years), and  
51  
52 **47** travelling time (90% in women living  $< 30$  minutes from the BHU *versus* 62% among those  $> 6$   
53  
54 **48** hours away). 50% participants reported a previous screening, the proportion of never-screened  
55  
56  
57 **49** women varied significantly by BHU (range: 2%–72%). 265 women (10%; 95%CI 9%–11%)  
58  
59  
60

1  
2  
3 50 were *care*HPV-positive, with a significant variation by BHU (range: 5%–19%) and number of  
4  
5 51 sexual partners (prevalence ratio for  $\geq 3$  vs. 0–1=1.55; 95% CI: 1.05–2.27).  
6  
7

## 8 **Conclusions:**

9  
10 53 Community-based cervical cancer screening, testing self-collected samples, can achieve high  
11  
12 54 coverage in rural Bhutan. New solutions to bring self-collection, HPV testing, and precancer  
13  
14 55 treatment to the remotest villages are needed.  
15  
16  
17 56

18  
19 57 **Keywords:** Cervical cancer screening; self-collection; *care*HPV; rural population; Bhutan.  
20  
21 58

## 22 59 **Article summary section:**

### 23 24 60 **Strengths and limitations of this study**

- 25  
26  
27  
28 61 • The study was conducted countrywide in a range of rural primary health care centres,  
29  
30 62 which varied in accessibility, size, and ethnic composition of the target population.  
31  
32 63 • The target population of each centre was enumerated on the basis of up-to-date and  
33  
34 64 detailed demographic surveys.  
35  
36 65 • A reliable local mobile data network ensured timely and effective study coordination,  
37  
38 66 data collection, and quality controls.  
39  
40 67 • The proposed diagnostic and treatment solutions presented specific challenges and were  
41  
42 68 less reliable than expected.  
43  
44  
45  
46  
47  
48  
49  
50  
51  
52  
53  
54  
55  
56  
57  
58  
59  
60

## 71 INTRODUCTION

72 Cervical cancer represents the most common cancer among females in Bhutan, with an age-  
73 standardised incidence rate of approximately 13 cases per 100,000 person years.<sup>1</sup> The country is  
74 strongly engaged in the prevention of cervical cancer. In the year 2000, the Ministry of Health  
75 launched a national cytology-based screening programme, and a Pap smear is currently  
76 recommended every three years to women aged 25–65 years.<sup>2</sup> In the year 2010, Bhutan was the  
77 first low/middle-income country (LMIC) to initiate a successful national vaccination programme  
78 against human papillomavirus (HPV) with >90% coverage in girls age 12–18 years.<sup>3</sup> Conversely,  
79 screening coverage is much lower and fairly heterogeneous across the country, ranging from  
80 20% to 60% of the target population in different provinces.<sup>4,5</sup> In rural areas, where approximately  
81 60% of the Bhutanese live,<sup>6</sup> cytology-based screening campaigns are occasionally conducted but  
82 coverage remains poor,<sup>4</sup> follow-up and treatment of screening-positive women challenging.  
83 Organized screening programmes are demanding in terms of administrative, human, financial,  
84 and logistic resources. Pap smear-based programmes require frequent visits, trained staff, and  
85 strict quality control. In contrast, HPV-based screening allows for longer screening intervals,<sup>7,8</sup>  
86 self-sampling,<sup>9</sup> and automation of the diagnostic procedure. It is therefore an attractive option to  
87 improve the acceptability and cost-effectiveness of screening.<sup>10</sup>  
88 In 2016, the Ministry of Health of Bhutan and the International Agency for Research on Cancer  
89 (IARC) implemented the “REACH-Bhutan” study to assess the feasibility, outcomes, and  
90 challenges of cervical cancer screening based on the *care*HPV test on self-collected samples  
91 among women 30–60 years of age in rural areas of the country.

92

93

## 94 MATERIAL AND METHODS

### 95 Study population and recruitment

96 Our study targeted women aged 30–60 years living in rural areas; recruitment and sample  
97 collection took place from April to May 2016 in Basic Health Units (BHUs), the facilities that  
98 provide primary health care to the Bhutanese population. The Bhutanese principal investigator  
99 (UT) selected 15 BHUs that differed by accessibility, size, and ethnic composition of the served  
100 population (Figure 1). Lists of household members in each village were obtained from the BHU  
101 survey produced yearly for demographic purposes.

102 Local health workers (HWs) visited the villages served by the selected BHUs to invite  
103 eligible women to come to the BHU to participate in the study on specified dates. The benefits of  
104 cervical cancer screening and the purposes of the study were explained to the women during  
105 public invitation sessions. Women from the same village were invited to attend screening at the  
106 BHUs on the same date. Pregnant women, women with mental disability, who had undergone  
107 hysterectomy or planned to leave the study area in the next 6 months were not eligible.

108 On the appointment date, two or three HWs and one of the two mobile study teams (one  
109 for East and one for West Bhutan, each composed of two nurses and supervised by a  
110 gynaecologist) provided additional information on the study, collected an informed consent  
111 form, and administered a short electronic questionnaire on the BHU's premises. The entire  
112 process required less than 20 minutes and certain BHUs were able to manage more than 100  
113 women per day. Whenever possible, the recently introduced national citizenship identification  
114 number (CID), which uniquely identifies Bhutanese citizens, and at least one mobile telephone  
115 number were recorded for follow-up purposes.

116

### 117 Sample collection, transportation, and laboratory analysis

118 Each participant was asked to provide a self-collected cervico-vaginal sample using a  
119 *careBrush*. They were instructed to insert the brush deep into the vagina and rotate it 3 to 5 times  
120 before dipping it in a tube containing *careHPV* collection medium. Tubes were then stored in  
121 fridges until they were transported in cool boxes to the central laboratory of Jigme Dorji  
122 Wangchuck National Referral Hospital (JDWNRH) in Thimphu. Samples were stored at ~4° C  
123 and an aliquot was tested using the *careHPV* platform (Qiagen Corporation, Gaithersburg, MD,  
124 USA) according to the manufacturer's instructions. The *careHPV* test is a validated signal-  
125 amplification, rapid batch diagnostic test for the detection of DNA of 13 high risk (HR) HPV  
126 types (HPV16, 18, 31, 33, 35, 39, 45, 51, 52, 56, 58, 59, 68) and HPV66.<sup>11</sup> *careHPV* results were  
127 communicated as soon as possible to each BHU to arrange follow-up of *careHPV*-positive  
128 women and of a fraction of *careHPV*-negative women, as a quality control measure.

### 129 Data collection and statistical analyses

130 All information on study participants and biological samples were collected and stored on  
131 portable electronic devices. Whenever a mobile data network was accessible, the stored data  
132 were uploaded to the IARC server and portable devices were synchronized with the most recent  
133 version of the study database. The distribution of the target population in each BHU by age  
134 group and by village of residence was obtained from the demographic survey conducted in year  
135 2015. Travelling time from village of residence to the corresponding BHU was estimated for  
136 each woman. On account of the socio-geographic characteristics of the study areas, most women  
137 had to reach the BHU on foot. We subdivided the travelling time into seven categories (i.e. <30  
138 minutes, 30 to 59 minutes, 1 hour to 1 hour 59 minutes, 2 hours to 2 hours 59 minutes, 3 hours to  
139 3 hours 59 minutes, 4 hours to 5 hours 59 minutes, and 6 or more hours), and fitted a mixed-



1  
2  
3 140 effect logistic model to data to assess the influence of travelling time on study participation, with  
4  
5 141 BHUs as clusters.

6  
7 142 Among participating women, we assessed prevalence ratios (PR) and corresponding 95%  
8  
9 143 confidence intervals (CI) for lack of previous cervical cancer screening and *careHPV* positivity  
10  
11 144 according to selected characteristics using binomial regression models with a log link and  
12  
13 145 adjustment for age group (30–39, 40–49, and  $\geq 50$  years) and BHU of recruitment, as appropriate.  
14  
15 146 For each variable of interest, missing or undisclosed (i.e. labelled as “prefer not to answer”)  
16  
17 147 information were treated as not informative and excluded from the analyses.

18  
19  
20  
21 148 The outcome of follow-up and clinical management of *careHPV*-positive women will be  
22  
23 149 reported in a future publication.

24  
25  
26 150

## 27 28 151 **RESULTS**

29  
30 152 Out of 15 BHUs included in “REACH-Bhutan”, 6 are located in West Bhutan and 9 in  
31  
32 153 East Bhutan (Figure 1). They serve a total of 3,648 women age 30–60 years (Figure 2). Overall  
33  
34 154 participation was 71% (95% CI: 69.5%–72.5%) and was similar in the West and the East. It  
35  
36 155 was, however, significantly heterogeneous by BHU (range: 31%–96%, I-square 99%,  $p < 0.001$ ),  
37  
38 156 and age group (81% in 30–39 year-old women but only 59% in  $\geq 50$  years). Participation steadily  
39  
40 157 decreased with the increase in travelling time from village to BHU being 90% (95% CI: 84%–  
41  
42 158 94%) for women living less than 30 minutes from the BHU but 62% (95% CI: 50%–73%)  
43  
44 159 among those 6 hours away or more (see appendix p1). The influence of travelling time strongly  
45  
46 160 increased with a woman’s age: the drop in participation between 30 minutes and 6 hours was  
47  
48 161 from 93% (95% CI: 87%–96%) to 76% (95% CI: 64%–84%) among women 30–39 years old,  
49  
50 162 but from 86% (95% CI: 75%–92%) to 45% (95% CI: 30%–62%) among women  $\geq 50$  years  
51  
52  
53  
54  
55

1  
2  
3 163 (Figure 3). The village of residence was not reported by 6 women or did not belong to the BHU  
4  
5 164 catchment area (7 women). These women did not contribute to the analysis reported in Figure 3.

6  
7  
8 165 A total 2,590 women accepted the invitation and came to a BHU (median age: 41 years;  
9  
10 166 inter-quartile range: 35 to 49 years). Ninety-nine percent belonged to 4 ethnic groups: Sarchop  
11  
12 167 (55%); Lhotsampa (27%); Ngalop (13%); and Khengpa (4%), each group predominating in at  
13  
14 168 least one BHU (Figure 1). All but two women provided a telephone number and 60% provided  
15  
16 169 their identity card number. Most women stated that self-sampling was easy to perform (96%) and  
17  
18 170 painless (90%). Macroscopic blood traces were observed in 3.5% of sample of non-menstruating  
19  
20 171 women (data not shown).

21  
22  
23 172 Fifty percent of participants reported having had previous screening (Figure 4A) and, among  
24  
25 173 them, 83% had had a Pap smear in the last 4 years (data not shown). The proportion of never-  
26  
27 174 screened women varied across individual BHUs (range: 2%–72%, I<sup>2</sup> = 99%, P-value<0.001).  
28  
29 175 Table 1 shows the characteristics that were significantly associated with lack of screening, i.e.,  
30  
31 176 age group (PR for  $\geq 50$  vs. 30–39 years =1.36; 95% CI: 1.26–1.47); region (PR for West vs.  
32  
33 177 East=2.84; 95% CI: 2.05–3.95); travelling time from village to BHU (PR for  $\geq 6$  hours vs. <1  
34  
35 178 hour =1.53; 95% CI: 1.38–1.69); ethnicity (PR vs. Sarchop = 1.65; 95% CI: 1.52–1.80 for  
36  
37 179 Ngalop; 1.41; 95% CI: 1.29–1.53 for Lhotsampa; and 0.58; 95% CI: 0.41–0.81 for Khengpa);  
38  
39 180 educational level (PR for literate vs. illiterate =0.85; 95% CI: 0.73–0.99); occupation (PR for  
40  
41 181 shopkeepers/saleswoman/manual worker vs. farmer/housewives =0.56; 95% CI: 0.34–0.90);  
42  
43 182 marital status (PR for never married vs. married = 1.35; 95% CI: 1.07–1.71); and nulliparity (PR  
44  
45 183 for 0 vs.  $\geq 3$  = 1.25; 95% CI: 1.05–1.49). Lifetime number of sexual partners, age at first sexual  
46  
47 184 intercourse, and *careHPV* positivity were unrelated to screening history (Table 1).  
48  
49  
50  
51  
52  
53  
54  
55  
56  
57  
58  
59  
60

1  
2  
3 185 Overall, 265 women (10%; 95% CI 9%–11%) were *care*HPV-positive with a significant  
4  
5 186 variation by BHU (range: 5%–19%,  $I^2 = 63%$ ,  $P\text{-value} < 0.001$ ) (Figure 4B). Table 2 shows the  
6  
7 187 relationship between *care*HPV positivity and various women’s characteristics. Significant risk  
8  
9 188 factors for HPV positivity included region of Bhutan (PR for West vs. East = 0.55; 95% CI:  
10  
11 189 0.30–1.00), marital status (PR for widow, separated or divorced vs. married = 1.71; 95% CI: 1.21–  
12  
13 190 2.41), number of pregnancies (PR for 1–2 vs.  $\geq 3 = 1.49$ ; 95% CI: 1.15–1.93), and lifetime  
14  
15 191 number of sexual partners (PR for  $\geq 3$  vs. 0–1 = 1.55; 95% CI: 1.05–2.27). *care*HPV positivity  
16  
17 192 was not significantly associated with age, ethnicity, educational level, occupation, age at  
18  
19 193 first sexual intercourse, and lack of previous screening (Table 2).  
20  
21  
22  
23  
24  
25  
26

## 27 195 **DISCUSSION**

28  
29 196 The findings from “REACH-Bhutan” show that community-based cervical cancer  
30  
31 197 screening using self-collected samples and *care*HPV test is feasible in BHUs and can achieve  
32  
33 198 high-coverage in rural Bhutan.  
34  
35

36 199 Seventy percent of women from rural communities responded favourably to the invitation  
37  
38 200 to come to their BHU to undergo HPV screening. In comparison, in Thimphu, the Bhutanese  
39  
40 201 capital, only 33% (95% CI: 29–37) of invited women of the same age group accepted to  
41  
42 202 participate in a similar study.<sup>5</sup> However, participation significantly decreased with increasing age  
43  
44 203 and travelling time between the village of residence and the BHU. The negative effect of living  
45  
46 204 far away from a BHU was especially strong among older women. Furthermore, older age and  
47  
48 205 large distance from BHUs were confirmed to be risk factors for lack of previous screening  
49  
50 206 among the women who participated in our present study (Table 1).  
51  
52  
53  
54  
55  
56  
57  
58  
59  
60

1  
2  
3 207 The large majority of study participants reported to be illiterate farmers or housewives,  
4  
5 208 currently married and sexually active. One-fifth reported two sexual partners or more, and 74%  
6  
7 209 three children or more. Among study participants, 50% had never been screened before,  
8  
9 210 confirming that rural areas are underserved compared to Thimphu, where 33% (95% CI: 30–36)  
10  
11 211 of 30–60 year-old study participants had never been screened.<sup>5</sup> Despite the remarkable socio-  
12  
13 212 demographic homogeneity of the rural communities included, participation in “REACH-Bhutan”  
14  
15 213 and history of previous screening among participating women were significantly different among  
16  
17 214 BHUs pointing to different levels of success in application of the national guidelines.

18  
19 215 The varying degree of participation in our current study and of previous screening across  
20  
21 216 BHUs may be also related to differences in ethnic composition. Indeed, lack of previous  
22  
23 217 screening was significantly more frequent among women who belonged to the Lhotsampa  
24  
25 218 (mostly Hindus) and Ngalop (mostly Buddhist) ethnic groups. It is, however, unclear whether  
26  
27 219 Lhotsampa and Ngalop were more reluctant to be screened or lived in areas where BHUs were  
28  
29 220 less committed to screening. For example, in the large BHU of Bara, at the western border with  
30  
31 221 India, there was a suggestion that a historical absence of female HWs had had a negative impact  
32  
33 222 on cervical screening attendance. The few literate women and those who were shopkeepers or  
34  
35 223 manual workers reported more screening attendance.

36  
37 224 Ten percent of women were *care*HPV-positive, i.e. a percentage only slightly lower than  
38  
39 225 that found in Thimphu in the same age group, i.e. 14.1% (95% CI: 12.0–16.4).<sup>12</sup> Lifetime  
40  
41 226 number of sexual partners, being widowed, separated or divorced, and having had 1 or 2 children  
42  
43 227 (as compared to 3) were significantly associated with HPV positivity as reported in previous  
44  
45 228 IARC HPV surveys.<sup>13,14</sup> Women in West Bhutan were less likely to be HPV positive than their  
46  
47 229 counterparts in the east of the country and this finding is likely to reflect differences in lifestyle

1  
2  
3 230 sexual habits across rural communities or ethnic groups. In fact, the percentage of women who  
4  
5 231 reported two or more sexual partners was 15% in the West versus 26% in the East.

7 232 The main strengths of the present study are the inclusion of a large number of women  
8  
9 233 from many rural villages and the relatively high and accurately estimated participation of invited  
10  
11 234 30–60 year-old women. Study implementation was also characterised by logistic and  
12  
13 235 technological challenges. We developed an mHealth platform and relied on the local mobile data  
14  
15 236 network to ensure a timely and effective coordination of BHU HWs and mobile study teams  
16  
17 237 across Bhutan, and to manage data collection, transmission, and real-time quality controls.<sup>15,16</sup>  
18  
19 238 Furthermore, virtually all study participants had access to at least one mobile phone, greatly  
20  
21 239 simplifying their recall for follow-up visits. The proposed diagnostic and treatment solutions also  
22  
23 240 presented specific challenges. For example, while our study demonstrated the excellent  
24  
25 241 acceptability and feasibility of organized screening based on self-collection, the *careHPV*  
26  
27 242 platform turned out to be less reliable than expected and, even after completion of the initial  
28  
29 243 training period, there still continued to be substantial wastage due to invalid *careHPV* runs. In  
30  
31 244 addition, the original plan of rapidly recalling women and offering them triage and, if necessary,  
32  
33 245 cryotherapy in one additional visit was not possible due to the hardship of roads and the frequent  
34  
35 246 malfunctioning of cryotherapy in Bhutan.

36  
37 247 A three-visit follow-up protocol is still ongoing and will be reported upon in a future  
38  
39 248 publication. At end December 2016, 248 (94%) *careHPV* positive women had had a follow-up  
40  
41 249 visit and 208 had undergone either cryotherapy (n=85) or loop electrosurgical excision procedure  
42  
43 250 (LEEP, n=123). However, due to the heavy workload in the Pathology Department, the follow-  
44  
45 251 up of women potentially in need of additional treatment is still incomplete.

## 53 252 **CONCLUSION**

1  
2  
3 253 The “REACH-Bhutan” study shows both the deep engagement of the Ministry of Health  
4  
5 254 and HWs, and the willingness and resilience of Bhutanese women to comply with cervical  
6  
7  
8 255 cancer screening recommendations. It also highlights, however, the need to find new solutions to  
9  
10 256 specific challenges, such as bringing self-collection closer to women, especially older ones living  
11  
12 257 in the remotest areas, possibly in coordination with the decentralized offer of other primary  
13  
14 258 health care activities, e.g., child vaccination, which is regularly brought from BHU to villages.  
15  
16  
17 259 Also, we underscore the need to assess the reliability of technological alternatives to the  
18  
19 260 *careHPV* platform,<sup>17</sup> and to cryotherapy and LEEP,<sup>18</sup> for the treatment of precancerous lesions in  
20  
21 261 countries such as Bhutan.<sup>19</sup>  
22  
23  
24 262  
25  
26 263  
27  
28 264  
29  
30  
31 265  
32  
33  
34  
35  
36  
37  
38  
39  
40  
41  
42  
43  
44  
45  
46  
47  
48  
49  
50  
51  
52  
53  
54  
55  
56  
57  
58  
59  
60

## 266 **Acknowledgements**

267 All authors thank participating women and acknowledge the excellent fieldwork  
268 performed by doctors and health-care workers in Bhutan. We also thank Mr Damien Georges for  
269 technical assistance.

## 270 **Contributors**

271 IB, ST, SF, GC, and UT conceived and designed the study. IB, SF, GC, and UT drafted  
272 the manuscript. ST, TC, FL, VT, and MP critically revised the manuscript. All authors  
273 substantially contributed to the acquisition, analysis, and interpretation of data and approved the  
274 final manuscript.

## 275 **Funding**

276 This work was supported by the Bill & Melinda Gates Foundation (grant number  
277 OPP1053353).

## 278 **Disclaimer**

279 The funders had no role in study design, data collection and analysis, decision to publish  
280 or in the preparation of the manuscript.

## 281 **Competing interests**

282 None declared.

## 283 **Ethics approval**

284 The present study had the approval of both the Research Ethical Board of the Bhutan  
285 Ministry of Health and the IARC Ethics Committee.

## 286 **Provenance and peer review**

287 Not commissioned; externally peer reviewed.

## 288 **Data sharing statement**

1  
2  
3  
4  
5  
6  
7  
8  
9  
10  
11  
12  
13  
14  
15  
16  
17  
18  
19  
20  
21  
22  
23  
24  
25  
26  
27  
28  
29  
30  
31  
32  
33  
34  
35  
36  
37  
38  
39  
40  
41  
42  
43  
44  
45  
46  
47  
48  
49  
50  
51  
52  
53  
54  
55  
56  
57  
58  
59  
60

289 No additional data are available.

For peer review only



1  
2  
3 **290 References**  
4

- 5 291 1. Ervik M, Lam F, Ferlay J, Mery L, Soerjomataram I, Bray F. Cancer Today. 2016.  
6  
7 <http://gco.iarc.fr/today> [accessed 11 November 2016].  
8 292  
9  
10 293 2. Dhendup T, Tshering P. Cervical cancer knowledge and screening behaviors among female  
11  
12 294 university graduates of year 2012 attending national graduate orientation program, Bhutan. *BMC*  
13  
14 295 *Womens Health* 2014; **14**(1): 44.  
15  
16 296 3. Dorji T, Tshomo U, Phuntsho S, et al. Introduction of a National HPV vaccination program into  
17  
18 297 Bhutan. *Vaccine* 2015; **33**(31): 3726-30.  
19  
20 298 4. Ministry of Health. National Health Survey. Thimphu, Bhutan: Ministry of Health 2012.  
21  
22 299 5. Baussano I, Tshomo U, Clifford GM, Tenet V, Tshokey T, Franceschi S. Cervical cancer screening  
23  
24 300 program in Thimphu, Bhutan: population coverage and characteristics associated with screening  
25  
26 301 attendance. *Bmc Womens Health* 2014; **14**: 147.  
27  
28 302 6. The World Bank. Rural population (% of total population).  
29  
30 <http://data.worldbank.org/indicator/SP.RUR.TOTL.ZS?locations=BT> [accessed 11 January 2017].  
31  
32 303  
33  
34 304 7. Arbyn M, Anttila A, Jordan J, et al. European Guidelines for Quality Assurance in Cervical Cancer  
35  
36 305 Screening. Second edition--summary document. *Ann Oncol* 2010; **21**(3): 448-58.  
37  
38 306 8. Ronco G, Dillner J, Elfstrom KM, et al. Efficacy of HPV-based screening for prevention of invasive  
39  
40 307 cervical cancer: follow-up of four European randomised controlled trials. *Lancet* 2014; **383**(9916): 524-  
41  
42 308 32.  
43  
44 309 9. Arrossi S, Thouyaret L, Herrero R, et al. Effect of self-collection of HPV DNA offered by  
45  
46 310 community health workers at home visits on uptake of screening for cervical cancer (the EMA study): a  
47  
48 311 population-based cluster-randomised trial. *Lancet Glob Health* 2015; **3**(2): e85-94.  
49  
50 312 10. Tsu V, Jeronimo J. Saving the World's Women from Cervical Cancer. *N Engl J Med* 2016; **374**(26):  
51  
52 313 2509-11.  
53  
54  
55  
56  
57  
58  
59  
60

- 1  
2  
3 314 11. Qiao YL, Sellors JW, Eder PS, et al. A new HPV-DNA test for cervical-cancer screening in  
4  
5 315 developing regions: a cross-sectional study of clinical accuracy in rural China. *Lancet Oncol* 2008; **9**(10):  
6  
7 316 929-36.  
8  
9  
10 317 12. Tshomo U, Franceschi S, Dorji D, et al. Human papillomavirus infection in Bhutan at the moment  
11  
12 318 of implementation of a national HPV vaccination programme. *BMC Infect Dis* 2014; **14**: 408.  
13  
14 319 13. Vaccarella S, Franceschi S, Herrero R, et al. Sexual behavior, condom use, and human  
15  
16 320 papillomavirus: pooled analysis of the IARC human papillomavirus prevalence surveys. *Cancer Epidemiol*  
17  
18 321 *Biomarkers Prev* 2006; **15**(2): 326-33.  
19  
20  
21 322 14. Vaccarella S, Herrero R, Dai M, et al. Reproductive factors, oral contraceptive use, and human  
22  
23 323 papillomavirus infection: pooled analysis of the IARC HPV prevalence surveys. *Cancer Epidemiol*  
24  
25 324 *Biomarkers Prev* 2006; **15**(11): 2148-53.  
26  
27  
28 325 15. Hall CS, Fottrell E, Wilkinson S, Byass P. Assessing the impact of mHealth interventions in low-  
29  
30 326 and middle-income countries--what has been shown to work? *Glob Health Action* 2014; **7**: 25606.  
31  
32 327 16. Howitt P, Darzi A, Yang GZ, et al. Technologies for global health. *Lancet* 2012; **380**(9840): 507-35.  
33  
34 328 17. Cubie HA, Morton D, Kawonga E, et al. HPV prevalence in women attending cervical screening in  
35  
36 329 rural Malawi using the cartridge-based Xpert(R) HPV assay. *J Clin Virol* 2016; **87**: 1-4.  
37  
38  
39 330 18. Dolman L, Sauvaget C, Muwonge R, Sankaranarayanan R. Meta-analysis of the efficacy of cold  
40  
41 331 coagulation as a treatment method for cervical intraepithelial neoplasia: a systematic review. *BJOG*  
42  
43 332 2014; **121**(8): 929-42.  
44  
45  
46 333 19. Viviano M, Kenfack B, Catarino R, et al. Feasibility of thermocoagulation in a screen-and-treat  
47  
48 334 approach for the treatment of cervical precancerous lesions in sub-Saharan Africa. *Bmc Womens Health*  
49  
50 335 2017; **17**(1): 2.  
51  
52  
53 336  
54  
55 337

338 **Table 1: Prevalence ratios (PR) for lack of previous cervical cancer screening and**  
 339 **corresponding 95% confidence intervals (CI) according to selected characteristics, Bhutan,**  
 340 **2016**

| Characteristic                                             | N tested | Never screened<br>N (%) | Adjusted<br>PR <sup>*</sup> | 95% CI    |
|------------------------------------------------------------|----------|-------------------------|-----------------------------|-----------|
| <b>Age (years)</b>                                         |          |                         |                             |           |
| 30–39                                                      | 1139     | 497 (43.6)              | 1                           | –         |
| 40–49                                                      | 818      | 407 (49.8)              | 1.14                        | 1.05–1.24 |
| ≥50                                                        | 633      | 383 (60.5)              | 1.36                        | 1.26–1.47 |
| $\chi^2_1$ for trend                                       |          |                         | <i>p</i> <0.001             |           |
| <b>Region</b>                                              |          |                         |                             |           |
| East                                                       | 1500     | 625 (41.7)              | 1                           | –         |
| West                                                       | 1090     | 662 (60.7)              | 2.84                        | 2.05–3.95 |
| <b>Travel time from village to BHU (hours)<sup>†</sup></b> |          |                         |                             |           |
| <1                                                         | 656      | 285 (43.5)              | 1                           | –         |
| 1–5                                                        | 1287     | 576 (44.8)              | 1.01                        | 0.91–1.12 |
| Missing                                                    | 6        | 4 (66.7)                | –                           | –         |
| ≥6–                                                        | 641      | 422 (65.8)              | 1.53                        | 1.38–1.69 |
| $\chi^2_1$ for trend                                       |          |                         | <i>p</i> <0.001             |           |
| <b>Ethnicity<sup>†</sup></b>                               |          |                         |                             |           |
| Scharchop                                                  | 1435     | 615 (42.9)              | 1                           | –         |
| Ngalop                                                     | 340      | 236 (69.4)              | 1.65                        | 1.52–1.80 |
| Lhotsampa                                                  | 686      | 401 (58.5)              | 1.41                        | 1.29–1.53 |
| Khengpa                                                    | 113      | 26 (23.0)               | 0.58                        | 0.41–0.81 |
| Other                                                      | 16       | 9 (56.3)                | 1.49                        | 0.97–2.31 |
| <b>Education level</b>                                     |          |                         |                             |           |
| Illiterate                                                 | 2372     | 1191 (50.2)             | 1                           | –         |
| Literate                                                   | 218      | 96 (44.0)               | 0.85                        | 0.73–0.99 |
| <b>Current occupation</b>                                  |          |                         |                             |           |
| Farmer/ housewife                                          | 2488     | 1254 (50.4)             | 1                           | –         |
| Shopkeeper/saleswoman/manual worker                        | 53       | 12 (22.6)               | 0.56                        | 0.34–0.90 |
| Clerical staff/teacher/health worker/nun                   | 49       | 21 (42.9)               | 0.97                        | 0.72–1.31 |
| <b>Marital status<sup>†</sup></b>                          |          |                         |                             |           |
| Married/living as married                                  | 2390     | 1175 (49.2)             | 1                           | –         |

|                                                            |      |             |      |                 |
|------------------------------------------------------------|------|-------------|------|-----------------|
| Never married                                              | 21   | 16 (76.2)   | 1.35 | 1.07–1.71       |
| Widow/separated/divorced                                   | 179  | 96 (53.6)   | 1.05 | 0.92–1.21       |
| <b>Number of pregnancies<sup>†</sup></b>                   |      |             |      |                 |
| 0                                                          | 67   | 43 (64.2)   | 1.25 | 1.05–1.49       |
| 1–2                                                        | 604  | 285 (47.2)  | 1.03 | 0.94–1.14       |
| ≥3                                                         | 1919 | 959 (50.0)  | 1    | –               |
| $\chi^2_1$ for trend                                       |      |             |      | <i>p</i> =0.057 |
| <b>Lifetime number of sexual partners</b>                  |      |             |      |                 |
| 0–1                                                        | 2020 | 983 (48.7)  | 1    | –               |
| 2                                                          | 341  | 166 (48.7)  | 0.97 | 0.88–1.08       |
| ≥3                                                         | 214  | 126 (58.9)  | 0.98 | 0.88–1.09       |
| Prefer not to answer                                       | 15   | 12 (80.0)   | –    | –               |
| $\chi^2_1$ for trend                                       |      |             |      | <i>p</i> =0.601 |
| <b>Age at first sexual intercourse (years)<sup>‡</sup></b> |      |             |      |                 |
| 9–14                                                       | 245  | 124 (50.6)  | 1    | –               |
| 15–16                                                      | 515  | 235 (45.6)  | 0.93 | 0.81–1.06       |
| 17–19                                                      | 968  | 452 (46.7)  | 1.00 | 0.89–1.12       |
| ≥20                                                        | 707  | 365 (51.6)  | 1.02 | 0.91–1.15       |
| Prefer not to answer / unknown                             | 143  | 101 (70.6)  | –    | –               |
| $\chi^2_1$ for trend                                       |      |             |      | <i>p</i> =0.151 |
| <b>HPV infection</b>                                       |      |             |      |                 |
| Negative                                                   | 2325 | 1168 (50.2) | 1    | –               |
| Positive                                                   | 265  | 119 (44.9)  | 1.01 | 0.91–1.13       |

341 CI=confidence interval; HPV=human papillomavirus; PR=prevalence ratio. \*Adjusted for age (3 classes: 30–39; 40–49; 50+) and  
 342 Basic Health Unit as appropriate. †Adjusted for age only – when adjusted for BHU, model does not converge. ‡Among sexually  
 343 active women.

344

345

346 **Table 2: Prevalence ratios (PR) for high-risk human papillomavirus (HPV) positivity and**  
 347 **corresponding 95% confidence intervals (CI) according to selected characteristics, Bhutan,**  
 348 **2016**

| Characteristic                           | N tested | care-HPV positive N (%) | Adjusted PR* | 95% CI    |
|------------------------------------------|----------|-------------------------|--------------|-----------|
| <b>Age (years)</b>                       |          |                         |              |           |
| 30–39                                    | 1139     | 129 (11.3)              | 1            | –         |
| 40–49                                    | 818      | 76 (9.3)                | 0.80         | 0.62–1.05 |
| ≥50                                      | 633      | 60 (9.5)                | 0.79         | 0.59–1.05 |
| $\chi^2_1$ for trend                     |          |                         | $p=0.073$    |           |
| <b>Region</b>                            |          |                         |              |           |
| East                                     | 1500     | 173 (11.5)              | 1            | –         |
| West                                     | 1090     | 92 (8.4)                | 0.55         | 0.30–1.00 |
| <b>Ethnicity</b>                         |          |                         |              |           |
| Scharchop                                | 1435     | 164 (11.4)              | 1            | –         |
| Ngalop                                   | 340      | 28 (8.2)                | 0.68         | 0.31–1.49 |
| Lhotsampa                                | 686      | 58 (8.5)                | 0.67         | 0.33–1.38 |
| Khengpa                                  | 113      | 15 (13.3)               | 1.80         | 0.31–10.5 |
| Other                                    | 16       | 0 (0)                   | –            | –         |
| <b>Education level</b>                   |          |                         |              |           |
| Illiterate                               | 2372     | 238 (10.0)              | 1            | –         |
| Literate                                 | 218      | 27 (12.4)               | 1.33         | 0.90–1.95 |
| <b>Current occupation</b>                |          |                         |              |           |
| Farmer/ housewife                        | 2488     | 253 (10.2)              | 1            | –         |
| Shopkeeper/saleswoman/manual worker      | 53       | 3 (5.7)                 | 0.56         | 0.18–1.68 |
| Clerical staff/teacher/health worker/nun | 49       | 9 (18.4)                | 1.65         | 0.90–3.01 |
| <b>Marital status</b>                    |          |                         |              |           |
| Married/living as married                | 2390     | 232 (9.7)               | 1            | –         |
| Never married                            | 21       | 3 (14.3)                | 1.53         | 0.54–4.38 |
| Widow/separated/divorced                 | 179      | 30 (16.8)               | 1.71         | 1.21–2.41 |
| <b>Number of pregnancies</b>             |          |                         |              |           |
| 0                                        | 67       | 8 (11.9)                | 1.29         | 0.66–2.49 |
| 1–2                                      | 604      | 83 (13.7)               | 1.49         | 1.15–1.93 |

|    |                                                 |      |            |           |           |
|----|-------------------------------------------------|------|------------|-----------|-----------|
| 1  |                                                 |      |            |           |           |
| 2  |                                                 |      |            |           |           |
| 3  | ≥3                                              | 1919 | 174 (9.1)  | 1         | –         |
| 4  | $\chi_1^2$ for trend                            |      |            | $p=0.007$ |           |
| 5  |                                                 |      |            |           |           |
| 6  |                                                 |      |            |           |           |
| 7  | <b>Lifetime number of sexual partners</b>       |      |            |           |           |
| 8  | 0–1                                             | 2020 | 198 (9.8)  | 1         | –         |
| 9  | 2                                               | 341  | 36 (10.6)  | 1.20      | 0.85–1.69 |
| 10 | ≥3                                              | 214  | 31 (14.5)  | 1.55      | 1.05–2.27 |
| 11 | Prefer not to answer                            | 15   | 0 (0.0)    | –         | –         |
| 12 | $\chi_1^2$ for trend                            |      |            | $p=0.022$ |           |
| 13 |                                                 |      |            |           |           |
| 14 |                                                 |      |            |           |           |
| 15 | <b>Age at first sexual intercourse (years)†</b> |      |            |           |           |
| 16 | 9–14                                            | 245  | 21 (8.6)   | 1         | –         |
| 17 | 15–16                                           | 515  | 48 (9.3)   | 1.05      | 0.64–1.71 |
| 18 | 17–19                                           | 968  | 109 (11.3) | 1.20      | 0.76–1.89 |
| 19 | ≥20                                             | 707  | 72 (10.2)  | 1.11      | 0.69–1.79 |
| 20 | Prefer not to answer / unknown                  | 143  | 14 (9.8)   | –         | –         |
| 21 | $\chi_1^2$ for trend                            |      |            | $p=0.576$ |           |
| 22 |                                                 |      |            |           |           |
| 23 |                                                 |      |            |           |           |
| 24 |                                                 |      |            |           |           |
| 25 | <b>History of PAP smear (years)</b>             |      |            |           |           |
| 26 | Ever                                            | 1303 | 146 (11.2) | 1         | –         |
| 27 | Never                                           | 1287 | 119 (9.3)  | 1.06      | 0.81–1.39 |
| 28 |                                                 |      |            |           |           |

349 CI=confidence interval; HPV=human papillomavirus; PR=prevalence ratio.\*Adjusted for age (3 classes: 30–39; 40–49; 50+) and  
 350 Basic Health Unit as appropriate. †Among sexually active women.

351

1  
2  
3 352 **Figure Legends**  
4

5 353

6  
7  
8 354 Figure 1: Map of Bhutan with study sites and predominant ethnic groups.\*  
9

10 355 The size of each dot is proportional to the size of the target population of each centre.  
11

12 356

13  
14 357 Figure 2: Participation (%) and corresponding 95% confidence intervals by Basic Health Unit,  
15  
16 region, and age group, Bhutan, 2016.  
17 358  
18

19 359

20  
21 360 Figure 3: Effect of travel time (on foot) on participation in REACH Bhutan, by age group,  
22  
23 Bhutan, 2016.  
24 361  
25

26 362

27  
28 363 Figure 4: Percent of A) lack of previous cervical cancer screening; and B) *care*-HPV positivity  
29  
30 by Basic Health Unit and overall in rural areas and in Thimphu, Bhutan, 2016.  
31 364  
32

33 365 \*women aged 30-60 years in Tshomo et al 2014.  
34  
35  
36  
37  
38  
39  
40  
41  
42  
43  
44  
45  
46  
47  
48  
49  
50  
51  
52  
53  
54  
55  
56  
57  
58  
59  
60

1  
2  
3  
4  
5  
6  
7  
8  
9  
10  
11  
12  
13  
14  
15  
16  
17  
18  
19  
20  
21  
22  
23  
24  
25  
26  
27  
28  
29  
30  
31  
32  
33  
34  
35  
36  
37  
38  
39  
40  
41  
42  
43  
44  
45  
46  
47  
48  
49  
50  
51  
52  
53  
54  
55  
56  
57  
58  
59  
60

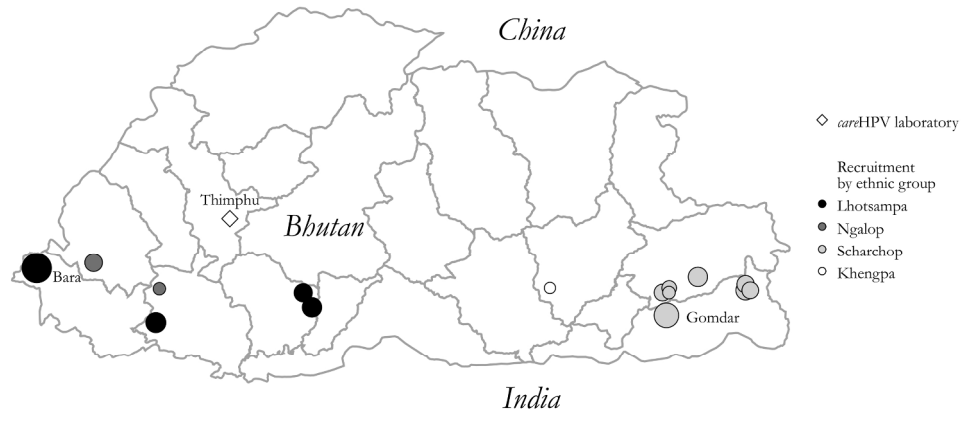

Figure 1: Map of Bhutan with study sites and predominant ethnic groups.\*  
The size of each dot is proportional to the size of the target population of each centre.

233x165mm (300 x 300 DPI)



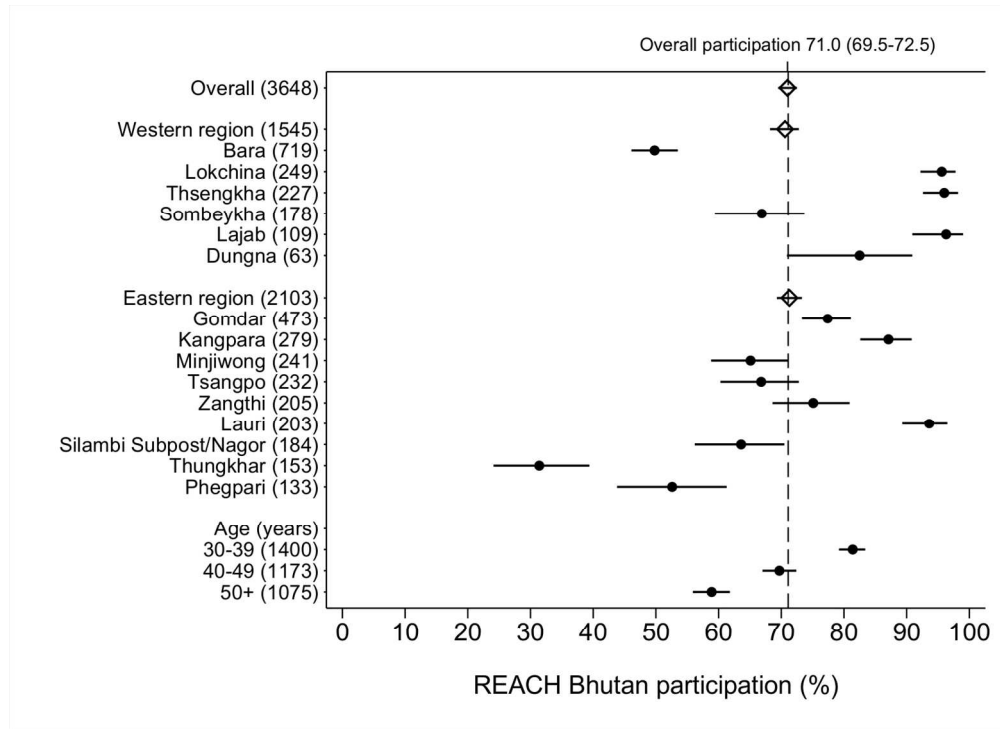

Figure 2: Participation (%) and corresponding 95% confidence intervals by Basic Health Unit, region, and age group, Bhutan, 2016.

139x101mm (300 x 300 DPI)

1  
2  
3  
4  
5  
6  
7  
8  
9  
10  
11  
12  
13  
14  
15  
16  
17  
18  
19  
20  
21  
22  
23  
24  
25  
26  
27  
28  
29  
30  
31  
32  
33  
34  
35  
36  
37  
38  
39  
40  
41  
42  
43  
44  
45  
46  
47  
48  
49  
50  
51  
52  
53  
54  
55  
56  
57  
58  
59  
60

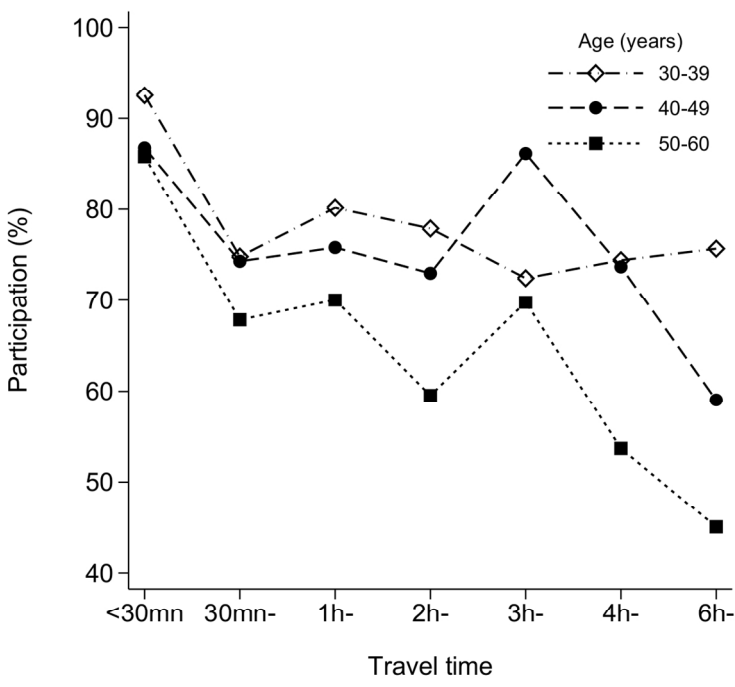

Figure 3: Effect of travel time (on foot) on participation in REACH Bhutan, by age group, Bhutan, 2016.

139x101mm (300 x 300 DPI)

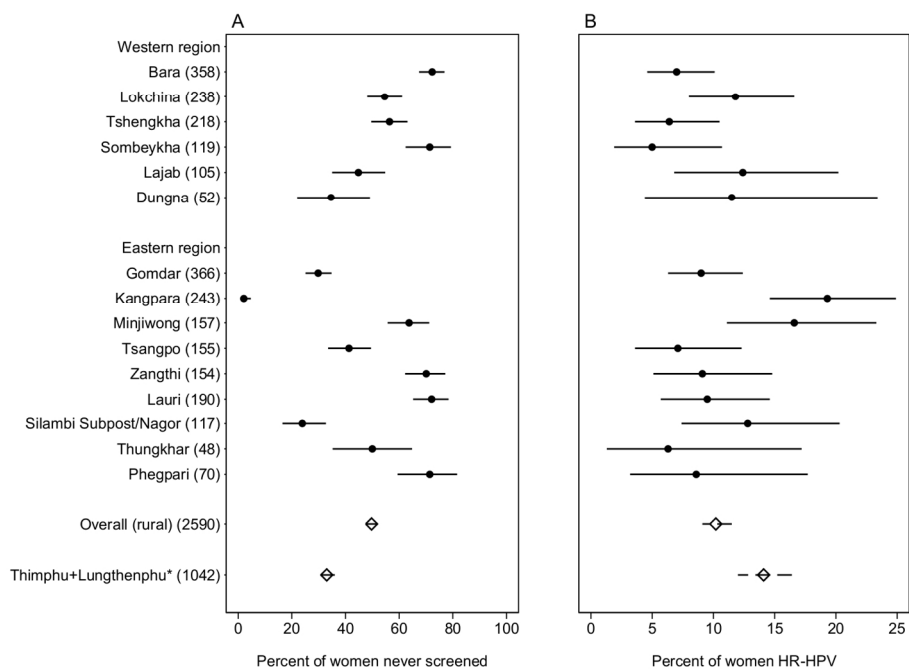

Figure 4: Percent of A) lack of previous cervical cancer screening; and B) care-HPV positivity by Basic Health Unit and overall in rural areas and in Thimphu, Bhutan, 2016.\*women aged 30-60 years in Tshomo et al 2014.

139x101mm (300 x 300 DPI)

**Appendix Figure 1: Effect of travel time on participation (%) in REACH Bhutan, A) overall, B) by age group with 95% confidence interval, Bhutan, 2016**

**A**

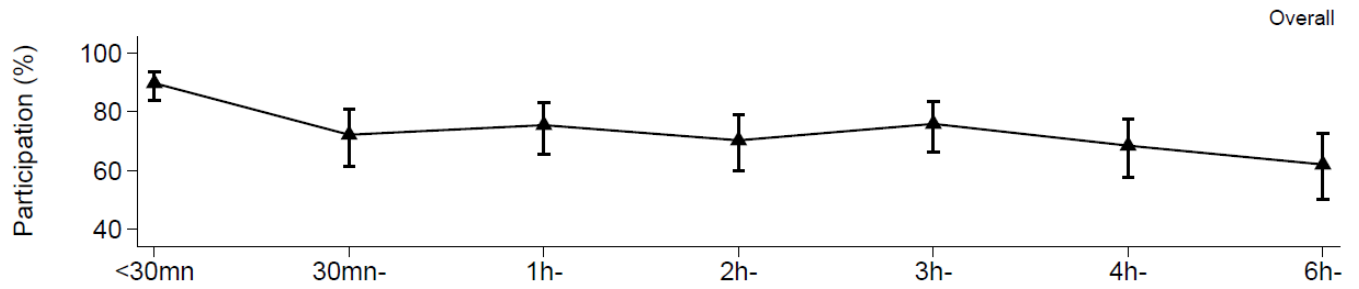

**B**

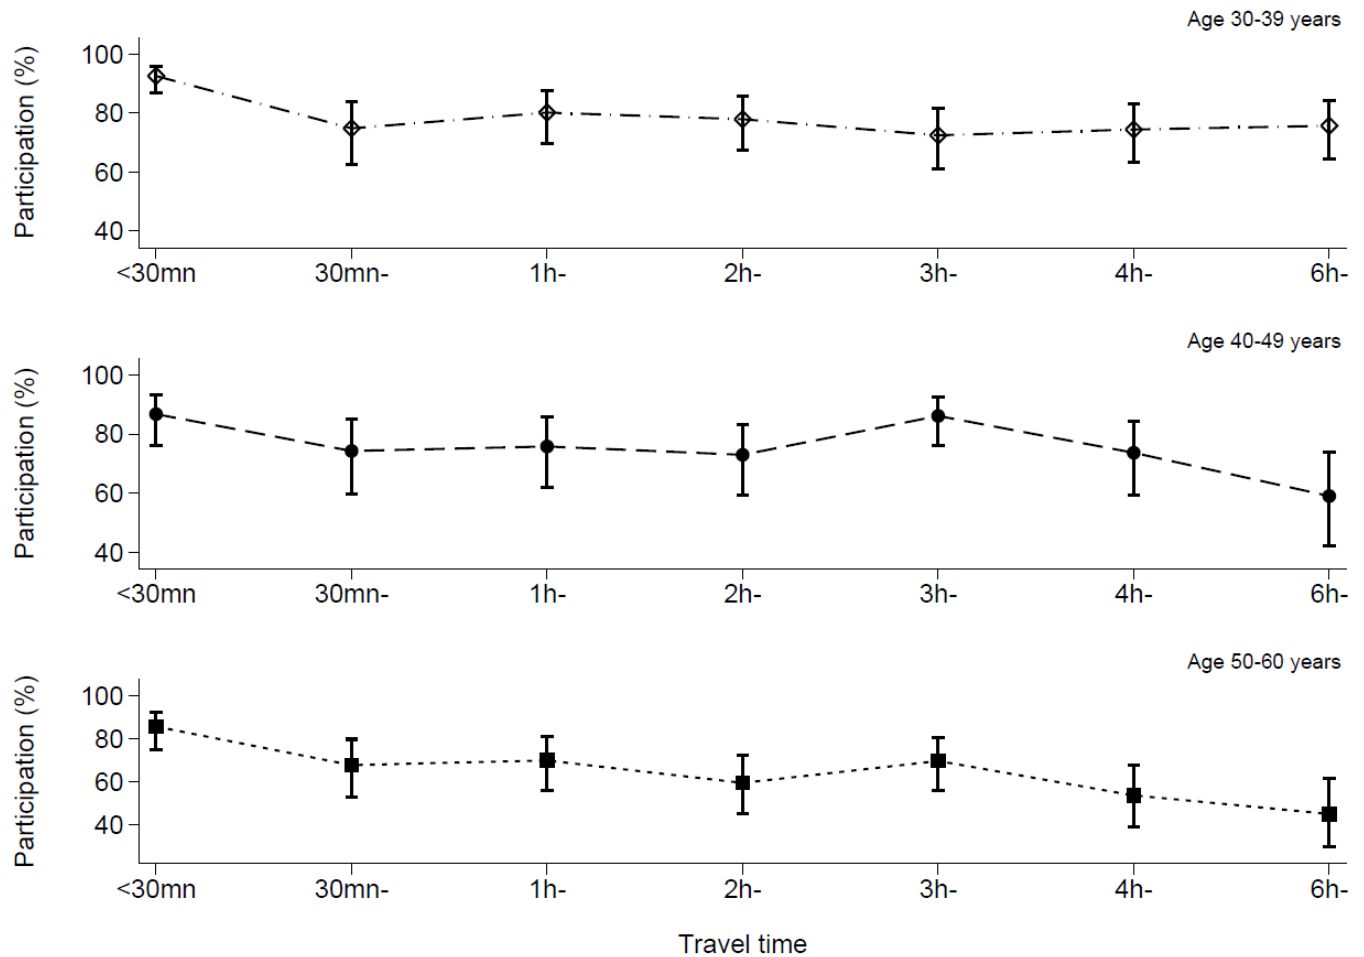

STROBE Statement—Checklist of items that should be included in reports of *cross-sectional studies*

|                           | Item No | Recommendation                                                                                                                                                                                    | Page                     |
|---------------------------|---------|---------------------------------------------------------------------------------------------------------------------------------------------------------------------------------------------------|--------------------------|
| <b>Title and abstract</b> | 1       | (a) Indicate the study's design with a commonly used term in the title or the abstract                                                                                                            | 1/3                      |
|                           |         | (b) Provide in the abstract an informative and balanced summary of what was done and what was found                                                                                               | 3                        |
| <b>Introduction</b>       |         |                                                                                                                                                                                                   |                          |
| Background/rationale      | 2       | Explain the scientific background and rationale for the investigation being reported                                                                                                              | 5                        |
| Objectives                | 3       | State specific objectives, including any prespecified hypotheses                                                                                                                                  | 5                        |
| <b>Methods</b>            |         |                                                                                                                                                                                                   |                          |
| Study design              | 4       | Present key elements of study design early in the paper                                                                                                                                           | 6                        |
| Setting                   | 5       | Describe the setting, locations, and relevant dates, including periods of recruitment, exposure, follow-up, and data collection                                                                   | 6                        |
| Participants              | 6       | (a) Give the eligibility criteria, and the sources and methods of selection of participants                                                                                                       | 6                        |
| Variables                 | 7       | Clearly define all outcomes, exposures, predictors, potential confounders, and effect modifiers. Give diagnostic criteria, if applicable                                                          | 7                        |
| Data sources/ measurement | 8*      | For each variable of interest, give sources of data and details of methods of assessment (measurement). Describe comparability of assessment methods if there is more than one group              | 7                        |
| Bias                      | 9       | Describe any efforts to address potential sources of bias                                                                                                                                         | 7                        |
| Study size                | 10      | Explain how the study size was arrived at                                                                                                                                                         | 6                        |
| Quantitative variables    | 11      | Explain how quantitative variables were handled in the analyses. If applicable, describe which groupings were chosen and why                                                                      | 7                        |
| Statistical methods       | 12      | (a) Describe all statistical methods, including those used to control for confounding                                                                                                             | 7                        |
|                           |         | (b) Describe any methods used to examine subgroups and interactions                                                                                                                               | 7                        |
|                           |         | (c) Explain how missing data were addressed                                                                                                                                                       | 8                        |
|                           |         | (d) If applicable, describe analytical methods taking account of sampling strategy                                                                                                                | 7                        |
|                           |         | (e) Describe any sensitivity analyses                                                                                                                                                             | NA                       |
| <b>Results</b>            |         |                                                                                                                                                                                                   |                          |
| Participants              | 13*     | (a) Report numbers of individuals at each stage of study—eg numbers potentially eligible, examined for eligibility, confirmed eligible, included in the study, completing follow-up, and analysed | 8                        |
|                           |         | (b) Give reasons for non-participation at each stage                                                                                                                                              | NA                       |
|                           |         | (c) Consider use of a flow diagram                                                                                                                                                                | Fig 2                    |
| Descriptive data          | 14*     | (a) Give characteristics of study participants (eg demographic, clinical, social) and information on exposures and potential confounders                                                          | 9; tables 1 & 2          |
|                           |         | (b) Indicate number of participants with missing data for each variable of interest                                                                                                               | 9, tables 1 & 2          |
| Outcome data              | 15*     | Report numbers of outcome events or summary measures                                                                                                                                              | 9, Figure 2,4 and Tables |
| Main results              | 16      | (a) Give unadjusted estimates and, if applicable, confounder-adjusted                                                                                                                             | 9                        |

|                          |    |                                                                                                                                                                            |              |
|--------------------------|----|----------------------------------------------------------------------------------------------------------------------------------------------------------------------------|--------------|
|                          |    | estimates and their precision (eg, 95% confidence interval). Make clear which confounders were adjusted for and why they were included                                     | Tables 1 & 2 |
|                          |    | (b) Report category boundaries when continuous variables were categorized                                                                                                  | Tables 1 & 2 |
|                          |    | (c) If relevant, consider translating estimates of relative risk into absolute risk for a meaningful time period                                                           | Figure 3     |
| Other analyses           | 17 | Report other analyses done—eg analyses of subgroups and interactions, and sensitivity analyses                                                                             | 8, Figure 3  |
| <b>Discussion</b>        |    |                                                                                                                                                                            |              |
| Key results              | 18 | Summarise key results with reference to study objectives                                                                                                                   | 10           |
| Limitations              | 19 | Discuss limitations of the study, taking into account sources of potential bias or imprecision. Discuss both direction and magnitude of any potential bias                 | 12           |
| Interpretation           | 20 | Give a cautious overall interpretation of results considering objectives, limitations, multiplicity of analyses, results from similar studies, and other relevant evidence | 12-13        |
| Generalisability         | 21 | Discuss the generalisability (external validity) of the study results                                                                                                      | 13           |
| <b>Other information</b> |    |                                                                                                                                                                            |              |
| Funding                  | 22 | Give the source of funding and the role of the funders for the present study and, if applicable, for the original study on which the present article is based              | 14           |

\*Give information separately for exposed and unexposed groups.

**Note:** An Explanation and Elaboration article discusses each checklist item and gives methodological background and published examples of transparent reporting. The STROBE checklist is best used in conjunction with this article (freely available on the Web sites of PLoS Medicine at <http://www.plosmedicine.org/>, Annals of Internal Medicine at <http://www.annals.org/>, and Epidemiology at <http://www.epidem.com/>). Information on the STROBE Initiative is available at [www.strobe-statement.org](http://www.strobe-statement.org).

# BMJ Open

## Cervical cancer screening in rural Bhutan with the careHPV test on self-collected samples: an ongoing cross-sectional, population-based study (REACH-Bhutan)

|                                 |                                                                                                                                                                                                                                                                                                                                                                                                                                                                                                                                                                 |
|---------------------------------|-----------------------------------------------------------------------------------------------------------------------------------------------------------------------------------------------------------------------------------------------------------------------------------------------------------------------------------------------------------------------------------------------------------------------------------------------------------------------------------------------------------------------------------------------------------------|
| Journal:                        | <i>BMJ Open</i>                                                                                                                                                                                                                                                                                                                                                                                                                                                                                                                                                 |
| Manuscript ID                   | bmjopen-2017-016309.R1                                                                                                                                                                                                                                                                                                                                                                                                                                                                                                                                          |
| Article Type:                   | Research                                                                                                                                                                                                                                                                                                                                                                                                                                                                                                                                                        |
| Date Submitted by the Author:   | 31-Mar-2017                                                                                                                                                                                                                                                                                                                                                                                                                                                                                                                                                     |
| Complete List of Authors:       | Baussano, Iacopo; International Agency for Research on Cancer,, Tshering, Sangay; Dewanhang Hospital Choden, Tashi; Jigme Dorji Wangchuck National Referral Hospital Lazzarato, Fulvio; International Agency for Research on Cancer, Tenet, Vanessa; International Agency for Research on Cancer, Plummer, Martyn; International Agency for Research on Cancer, Franceschi, Silvia; International Agency for Research on Cancer,, ; Dr Clifford, G; International Agency for Research on Cancer Tshomo, Ugyen; Jigme Dorji Wangchuck National Referral Hospital |
| <b>Primary Subject Heading</b>: | Epidemiology                                                                                                                                                                                                                                                                                                                                                                                                                                                                                                                                                    |
| Secondary Subject Heading:      | Public health                                                                                                                                                                                                                                                                                                                                                                                                                                                                                                                                                   |
| Keywords:                       | Cervical cancer screening, self-collection, careHPV, rural population, Bhutan                                                                                                                                                                                                                                                                                                                                                                                                                                                                                   |
|                                 |                                                                                                                                                                                                                                                                                                                                                                                                                                                                                                                                                                 |

SCHOLARONE™  
Manuscripts

only

1  
2  
3 1 **Title: Cervical cancer screening in rural Bhutan with the *care*HPV test on self-collected**  
4  
5 2 **samples: an ongoing cross-sectional, population-based study (REACH-Bhutan)**  
6  
7  
8 3

9  
10 4 **List of authors:**

11  
12 5 Iacopo Baussano<sup>1\*</sup>, MD, Sangay Tshering<sup>2</sup>, MD, Tashi Choden<sup>3</sup>, BSc, Fulvio Lazzarato<sup>1,4,5</sup>,  
13  
14 6 MSc, Vanessa Tenet<sup>1</sup>, MSc, Martyn Plummer<sup>1</sup>, PhD, Silvia Franceschi<sup>1</sup>, MD, Gary M. Clifford<sup>1</sup>,  
15  
16 7 PhD, Ugyen Tshomo<sup>3</sup>, MD.  
17  
18  
19

20  
21 8 **Author affiliations:**

22  
23  
24 9 <sup>1</sup>International Agency for Research on Cancer, 150 cours Albert Thomas, 69372 Lyon Cedex 08,  
25  
26 10 France.  
27  
28

29  
30 11 <sup>2</sup>Dewanthang Hospital, Samdrup Jongkhar, Bhutan.  
31

32  
33 12 <sup>3</sup>Jigme Dorji Wangchuck National Referral Hospital, Thimphu, Bhutan.  
34

35  
36 13 <sup>4</sup>Unit of Cancer Epidemiology, AOU Città della Salute e della Scienza, Hospital of Turin, Turin,  
37  
38 14 Italy  
39

40  
41 15 <sup>5</sup>Department of Translational Medicine, University of Piemonte Orientale Avogadro, Novara,  
42  
43 16 Italy  
44  
45

46  
47 17 **Brief title: Cervical cancer screening in rural Bhutan**  
48  
49  
50 18



1  
2  
3  
4 19 \*Address for correspondence: Dr. Iacopo Baussano, International Agency for Research on  
5  
6 20 Cancer, 150 cours Albert Thomas, 69372 Lyon CEDEX 08, France; Tel.: +33-472738048; Fax:  
7  
8 21 +33-472738345; email: baussanoi@iarc.fr  
9

10 22 Main text word count: approx. 2565 (limit 4000 words).

11  
12  
13 23 Abstract word count: 300 words

14  
15 24 Number of references: 24.

16  
17 25 Tables: 2; Figures: 4

18  
19  
20 26 Appendix: 1 including 1 figure

21  
22 27  
23  
24  
25  
26  
27  
28  
29  
30  
31  
32  
33  
34  
35  
36  
37  
38  
39  
40  
41  
42  
43  
44  
45  
46  
47  
48  
49  
50  
51  
52  
53  
54  
55  
56  
57  
58  
59  
60

1  
2  
3 28 **Abstract (words=300)**  
4

5 29 **Objectives.** The Bhutanese Screening Programme recommends a Pap smear every three years for  
6  
7  
8 30 women aged 25–65 years, and coverage ranges from 20% to 60%, being especially challenging  
9  
10 31 in rural settings. The “REACH-Bhutan” study was conducted to assess the feasibility and  
11  
12 32 outcomes of a novel approach to cervical cancer screening in rural Bhutan.

13 33 **Design.** Cross-sectional, population-based study of cervical cancer screening based on the  
14  
15  
16  
17 34 *careHPV* test on self-collected samples.

18  
19  
20 35 **Setting.** Women were recruited in rural primary health care centres, i.e. Basic Health Units  
21  
22 36 (BHU), across Bhutan.

23  
24 37 **Participants.** Overall, 3,648 women aged 30–60 were invited from 15 BHUs differing in  
25  
26  
27 38 accessibility, size, and ethnic composition of the population.

28  
29 39 **Interventions.** Participants provided a self-collected cervico-vaginal sample and were  
30  
31  
32 40 interviewed. Samples were tested using *careHPV* in Thimphu (the Bhutanese capital) referral  
33  
34 41 laboratory.

35  
36 42 **Main outcome measures.** Screening participation by geographic area, centre, age, and travelling  
37  
38  
39 43 time. Previous screening history and *careHPV*-positivity by selected characteristics of the  
40  
41 44 participants.

42  
43 45 **Results.** In April/May 2016, 2590 women (median age: 41) were enrolled. Study participation  
44  
45  
46 46 was 71% and significantly heterogeneous by BHU (range: 31%–96%). Participation decreased  
47  
48 47 with increase in age (81% in 30–39 year-old women; 59% in  $\geq 50$  years), and travelling time  
49  
50 48 (90% in women living  $< 30$  minutes from the BHU *versus* 62% among those  $> 6$  hours away).  
51  
52 49 50% participants reported no previous screening, with the proportion of never-screened women  
53  
54  
55 50 varying significantly by BHU (range: 2%–72%). 265 women (10%; 95%CI 9%–11%) were  
56  
57  
58  
59  
60

1  
2  
3  
4 51 *care*HPV-positive, with a significant variation by BHU (range: 5%–19%) and number of sexual  
5  
6 52 partners (prevalence ratio for  $\geq 3$  vs. 0–1=1.55; 95% CI: 1.05–2.27).

7  
8 53 **Conclusions:**

9  
10 54 Community-based cervical cancer screening by testing self-collected samples for HPV can  
11  
12 55 achieve high coverage in rural Bhutan. However, solutions to bring self-collection, HPV testing,  
13  
14 56 and precancer treatment even closer to the remotest villages are needed.  
15  
16  
17  
18 57

19  
20 58 **Keywords:** Cervical cancer screening; self-collection; *care*HPV; rural population; Bhutan.  
21  
22 59

23  
24  
25 60 **Article summary section:**

26  
27 61 **Strengths and limitations of this study**

- 28  
29 62 • The study was conducted countrywide in a range of rural primary health care centres,  
30  
31 63 which varied in accessibility, size, and ethnic composition of the target population.  
32  
33 64 • The target population of each centre was enumerated on the basis of up-to-date and  
34  
35 65 detailed demographic surveys.  
36  
37 66 • A reliable local mobile data network ensured timely and effective study coordination,  
38  
39 67 data collection, and quality controls.  
40  
41 68 • The proposed diagnostic and treatment solutions presented specific challenges and were  
42  
43 69 less reliable than expected.  
44  
45  
46  
47  
48  
49  
50  
51  
52  
53  
54  
55  
56  
57  
58  
59  
60

## 72 INTRODUCTION

73 Cervical cancer represents the most common cancer among females in Bhutan, with an age-  
74 standardised incidence rate of approximately 13 cases per 100,000 person years.<sup>1</sup> The country is  
75 strongly engaged in the prevention of cervical cancer. In the year 2000, the Ministry of Health  
76 launched a national cytology-based screening programme, and a Pap smear is currently  
77 recommended every three years to women aged 25–65 years.<sup>2</sup> In the year 2010, Bhutan was the  
78 first low/middle-income country (LMIC) to initiate a successful national vaccination programme  
79 against human papillomavirus (HPV) with >90% coverage in girls age 12–18 years.<sup>3</sup> Conversely,  
80 screening coverage is much lower and fairly heterogeneous across the country, ranging from  
81 20% to 60% of the target population in different provinces.<sup>4,5</sup> In rural areas, where approximately  
82 60% of the Bhutanese live,<sup>6</sup> cytology-based screening campaigns are occasionally conducted but  
83 coverage remains poor,<sup>4</sup> and follow-up and treatment of screening-positive women is  
84 challenging.

85 Organized screening programmes are demanding in terms of administrative, human, financial,  
86 and logistic resources. Pap smear-based programmes require frequent visits, trained staff, and  
87 strict quality control. In contrast, HPV-based screening allows for longer screening intervals,<sup>7,8</sup>  
88 self-sampling,<sup>9</sup> and automation of the diagnostic procedure. It is therefore an attractive option to  
89 improve the acceptability and cost-effectiveness of screening.<sup>10</sup>

90 In 2016, the Ministry of Health of Bhutan and the International Agency for Research on  
91 Cancer (IARC) implemented the “REACH-Bhutan” study to assess the feasibility, outcomes, and  
92 challenges of cervical cancer screening based on the *careHPV* test on self-collected samples  
93 among women 30–60 years of age in rural areas of the country. In the current report, we describe  
94 the study design, target population, recruitment and sample collection methods, key

1  
2  
3 95 characteristics of study participants, and patterns of participation. Details on the performance of  
4  
5 96 *careHPV* testing and clinical management of *careHPV*-positive women will be reported in future  
6  
7  
8 97 publications.  
9

10  
11 98

## 12 13 99 **MATERIAL AND METHODS**

### 14 15 100 Study population and recruitment

16  
17 101 Our study targeted women aged 30–60 years living in rural areas; recruitment and sample  
18  
19  
20 102 collection took place from April to May 2016 in Basic Health Units (BHUs), the facilities that  
21  
22 103 provide primary health care to the Bhutanese population. The Bhutanese principal investigator  
23  
24 104 (UT) selected 15 BHUs that differed by accessibility, size, and ethnic composition of the served  
25  
26  
27 105 population (Figure 1). Lists of household members in each village were obtained from the BHU  
28  
29 106 survey produced yearly for demographic purposes.

30  
31 107 Local health workers (HWs) familiar with community mobilization were instructed by  
32  
33  
34 108 the principal investigator in the specifics of self-sampling for cervical screening, and visited the  
35  
36 109 villages served by the selected BHUs to invite eligible women to come to the BHU to participate  
37  
38  
39 110 in the study on specified dates. The benefits of cervical cancer screening and the purposes of the  
40  
41 111 study were explained to the women during public invitation sessions. All women from a given  
42  
43 112 village were invited to attend screening at the BHUs on the same date. Pregnant women, women  
44  
45  
46 113 with mental disability, who had undergone hysterectomy or planned to leave the study area in the  
47  
48 114 next 6 months were not eligible.

49  
50 115 On the appointment date, two or three HWs and one of the two mobile study teams (one  
51  
52  
53 116 for East and one for West Bhutan, each composed of two nurses and supervised by a  
54  
55 117 gynaecologist) provided additional information on the study, collected an informed consent  
56  
57

1  
2  
3 118 form, and administered a short electronic questionnaire on the BHU's premises. The entire  
4  
5  
6 119 process required less than 20 minutes and certain BHUs were able to manage more than 100  
7  
8 120 women per day. Whenever possible, the recently introduced national citizenship identification  
9  
10 121 number (CID), which uniquely identifies Bhutanese citizens, and at least one mobile telephone  
11  
12 122 number were recorded for follow-up purposes.  
13  
14

15 123

#### 17 124 Sample collection, transportation, and laboratory analysis

19  
20 125 Each participant was asked to provide a self-collected cervico-vaginal sample using a  
21  
22 126 *careBrush*. They were instructed to insert the brush deep into the vagina and rotate it 3 to 5 times  
23  
24 127 before dipping it in a tube containing *careHPV* collection medium. The study team nurse  
25  
26 128 provided guidance to the participants on how to perform self-collection but did not attend the  
27  
28 129 self-collection procedure. Tubes were then stored in fridges until they were transported in cool  
29  
30 130 boxes to the central laboratory of Jigme Dorji Wangchuck National Referral Hospital  
31  
32 131 (JDWNRH) in Thimphu. Samples were stored at  $\sim 4^{\circ}\text{C}$  and an aliquot was tested using the  
33  
34 132 *careHPV* platform (Qiagen Corporation, Gaithersburg, MD, USA) according to the  
35  
36 133 manufacturer's instructions. The *careHPV* test is a validated signal-amplification, rapid batch  
37  
38 134 diagnostic test for the detection of DNA of 13 high risk (HR) HPV types (HPV16, 18, 31, 33, 35,  
39  
40 135 39, 45, 51, 52, 56, 58, 59, 68) and HPV66.<sup>11</sup> *careHPV* results were communicated by the central  
41  
42 136 laboratory as soon as possible to each BHU (after a median of 11 days; inter-quartile range: 9 to  
43  
44 137 33 days) to arrange follow-up of *careHPV*-positive women and of a random fraction of  
45  
46 138 *careHPV*-negative women, as a quality control measure.  
47  
48  
49  
50  
51

52 139

#### 55 140 Data collection and statistical analyses

1  
2  
3 141 All information on study participants and biological samples were collected and stored on  
4  
5  
6 142 portable electronic devices. Whenever a mobile data network was accessible, the stored data  
7  
8 143 were uploaded to the IARC server and portable devices were synchronized with the most recent  
9  
10 144 version of the study database. The distribution of the target population in each BHU by age  
11  
12 145 group and by village of residence was obtained from the demographic survey conducted in year  
13  
14 146 2015. Travelling time was estimated from each village of residence to the corresponding BHU.  
15  
16  
17 147 On account of the socio-geographic characteristics of the study areas, most women had to reach  
18  
19 148 the BHU on foot. We subdivided the travelling time into seven categories (i.e. <30 minutes, 30 to  
20  
21 149 59 minutes, 1 hour to 1 hour 59 minutes, 2 hours to 2 hours 59 minutes, 3 hours to 3 hours 59  
22  
23 150 minutes, 4 hours to 5 hours 59 minutes, and 6 or more hours), and fitted a mixed-effect logistic  
24  
25 151 model to data to assess the influence of travelling time on study participation, with BHUs as  
26  
27 152 clusters.

28  
29  
30  
31 153 Among participating women, we assessed prevalence ratios (PR) and corresponding 95%  
32  
33 154 confidence intervals (CI) for lack of previous cervical cancer screening and *careHPV* positivity  
34  
35 155 according to selected characteristics using binomial regression models with a log link and  
36  
37 156 adjustment for age group (30–39, 40–49, and  $\geq 50$  years) and BHU of recruitment, as appropriate.  
38  
39 157 For each variable of interest, missing or undisclosed (i.e. labelled as “prefer not to answer”)  
40  
41 158 information were treated as not informative and excluded from the analyses.  
42  
43  
44  
45  
46  
47

## 48 160 RESULTS

49  
50 161 Out of 15 BHUs included in “REACH-Bhutan”, 6 are located in West Bhutan and 9 in  
51  
52 162 East Bhutan (Figure 1). They serve a total of 3,648 women age 30–60 years (Figure 2). Overall  
53  
54 163 participation was 71% (95% CI: 69.5%–72.5%) and was similar in the West and the East. It  
55  
56  
57  
58  
59  
60

1  
2  
3 164 was, however, significantly heterogeneous by BHU (range: 31%–96%, I-square 99%,  $p < 0.001$ ),  
4  
5 165 and age group (81% in 30–39 year-old women but only 59% in  $\geq 50$  years). Participation steadily  
6  
7 166 decreased with the increase in travelling time from village to BHU being 90% (95% CI: 84%–  
8  
9 94%) for women living less than 30 minutes from the BHU but 62% (95% CI: 50%–73%)  
10  
11 167 among those 6 hours away or more (see appendix p1). The influence of travelling time strongly  
12  
13 168 increased with a woman's age: the drop in participation between 30 minutes and 6 hours was  
14  
15 169 from 93% (95% CI: 87%–96%) to 76% (95% CI: 64%–84%) among women 30–39 years old,  
16  
17 170 but from 86% (95% CI: 75%–92%) to 45% (95% CI: 30%–62%) among women  $\geq 50$  years  
18  
19 171 (Figure 3). The village of residence was not reported by 6 women or did not belong to the BHU  
20  
21 172 catchment area (7 women). These women did not contribute to the analysis reported in Figure 3.  
22  
23 173

24  
25 174 A total 2,590 women accepted the invitation and came to a BHU (median age: 41 years;  
26  
27 175 inter-quartile range: 35 to 49 years). Ninety-nine percent belonged to 4 ethnic groups: Sarchop  
28  
29 176 (55%); Lhotsampa (27%); Ngalop (13%); and Khengpa (4%), each group predominating in at  
30  
31 177 least one BHU (Figure 1). All but two women provided a telephone number and 60% provided  
32  
33 178 their identity card number. Most women stated that self-sampling was easy to perform (96%) and  
34  
35 179 painless (90%). Macroscopic blood traces were observed in 3.5% of sample of non-menstruating  
36  
37 180 women (data not shown).  
38

39  
40 181 Fifty percent of participants reported having had previous screening (Figure 4A) and, among  
41  
42 182 them, 83% had had a Pap smear in the last 4 years (data not shown). The proportion of never-  
43  
44 183 screened women varied across individual BHUs (range: 2%–72%,  $I^2 = 99%$ ,  $P\text{-value} < 0.001$ ).  
45  
46 184 Table 1 shows the characteristics that were significantly associated with lack of screening, i.e.,  
47  
48 185 age group (PR for  $\geq 50$  vs. 30–39 years = 1.36; 95% CI: 1.26–1.47); region (PR for West vs.  
49  
50 186 East = 2.84; 95% CI: 2.05–3.95); travelling time from village to BHU (PR for  $\geq 6$  hours vs.  $< 1$   
51  
52  
53  
54  
55  
56  
57  
58  
59  
60



1  
2  
3 187 hour =1.53; 95% CI: 1.38–1.69); ethnicity (PR vs. Scharchop = 1.65; 95% CI: 1.52–1.80 for  
4  
5 188 Ngalop; 1.41; 95% CI: 1.29–1.53 for Lhotsampa; and 0.58; 95% CI: 0.41–0.81 for Khengpa);  
6  
7  
8 189 educational level (PR for literate vs. illiterate =0.85; 95% CI: 0.73–0.99); occupation (PR for  
9  
10 190 shopkeepers/saleswoman/manual worker vs. farmer/housewives =0.56; 95% CI: 0.34–0.90);  
11  
12 191 marital status (PR for never married vs. married = 1.35; 95% CI: 1.07–1.71); and nulliparity (PR  
13  
14 192 for 0 vs.  $\geq 3$  = 1.25; 95% CI: 1.05–1.49. Lifetime number of sexual partners, age at first sexual  
15  
16 193 intercourse, and *careHPV* positivity were unrelated to screening history (Table 1).  
17  
18  
19

20 194 Overall, 265 women (10%; 95% CI 9%–11%) were *careHPV*-positive with a significant  
21  
22 195 variation by BHU (range: 5%–19%,  $I^2 = 63%$ , P-value<0.001) (Figure 4B). Table 2 shows the  
23  
24 196 relationship between *careHPV* positivity and various women’s characteristics. Significant risk  
25  
26 197 factors for HPV positivity included region of Bhutan (PR for West vs. East =0.55; 95% CI:  
27  
28 198 0.30–1.00), marital status (PR for widow, separated or divorced vs. married=1.71; 95% CI: 1.21–  
29  
30 199 2.41), number of pregnancies (PR for 1–2 vs.  $\geq 3$  =1.49; 95% CI: 1.15–1.93), and lifetime  
31  
32 200 number of sexual partners (PR for  $\geq 3$  vs. 0–1=1.55; 95% CI: 1.05–2.27). *careHPV* positivity  
33  
34 201 was not significantly associated with age, ethnicity, educational level, occupation, age at first  
35  
36 202 sexual intercourse, and lack of previous screening (Table 2).  
37  
38  
39  
40  
41  
42  
43

## 44 204 **DISCUSSION**

45  
46 205 The findings from “REACH-Bhutan” show that community-based cervical cancer  
47  
48 206 screening using self-collected samples and *careHPV* test is feasible in BHUs and can achieve  
49  
50 207 high-coverage in rural Bhutan. Our study, therefore, can be added to an increasing number of  
51  
52 208 evaluations of the implementation of *care-HPV* screening in under-served populations of Asia,  
53  
54 209 <sup>12-14</sup> Africa, <sup>15-17</sup> and Latin America. <sup>18 19</sup>  
55  
56  
57  
58  
59  
60

1  
2  
3 210 Seventy percent of women from rural communities responded favourably to the invitation  
4  
5  
6 211 to come to their BHU to undergo HPV screening. In comparison, in Thimphu, the Bhutanese  
7  
8 212 capital, only 33% (95% CI: 29–37) of invited women of the same age group accepted to take part  
9  
10 213 in a study of clinician collected samples.<sup>5</sup> However, participation significantly decreased with  
11  
12 214 increasing age and travelling time between the village of residence and the BHU. The negative  
13  
14 215 effect of living far away from a BHU was especially strong among older women. Furthermore,  
15  
16 216 older age and large distance from BHUs were confirmed to be risk factors for lack of previous  
17  
18 217 screening among the women who participated in our present study (Table 1).  
19  
20  
21

22 218 The large majority of study participants reported to be illiterate farmers or housewives,  
23  
24 219 currently married and sexually active. One-fifth reported two sexual partners or more, and 74%  
25  
26 220 three children or more. Among study participants, 50% had never been screened before,  
27  
28 221 confirming that rural areas are underserved compared to Thimphu, where 33% (95% CI: 30–36)  
29  
30 222 of 30–60 year-old study participants had never been screened.<sup>5</sup> Despite the remarkable socio-  
31  
32 223 demographic homogeneity of the rural communities included, participation in “REACH-Bhutan”  
33  
34 224 and history of previous screening among participating women were significantly different among  
35  
36 225 BHUs pointing to different levels of success in application of the national guidelines.  
37  
38  
39  
40

41 226 The varying degree of participation in our current study and of previous screening across  
42  
43 227 BHUs may be also related to differences in ethnic composition. Indeed, lack of previous  
44  
45 228 screening was significantly more frequent among women who belonged to the Lhotsampa  
46  
47 229 (mostly Hindus) and Ngalop (mostly Buddhist) ethnic groups. It is, however, unclear whether  
48  
49 230 Lhotsampa and Ngalop were more reluctant to be screened or lived in areas where BHUs were  
50  
51 231 less committed to screening. For example, in the large BHU of Bara, at the western border with  
52  
53 232 India, there was a suggestion that a historical absence of female HWs had had a negative impact  
54  
55  
56  
57  
58  
59  
60

1  
2  
3 233 on cervical screening attendance. The few literate women and those who were shopkeepers or  
4  
5 234 manual workers reported more screening attendance.  
6  
7

8 235 Ten percent of women were *careHPV*-positive, i.e. a percentage only slightly lower than  
9  
10 236 that found in Thimphu in the same age group, i.e. 14.1% (95% CI: 12.0–16.4).<sup>20</sup> Lifetime  
11  
12 237 number of sexual partners, being widowed, separated or divorced, and having had 1 or 2 children  
13  
14 238 (as compared to 3) were significantly associated with HPV positivity as reported in previous  
15  
16 239 IARC HPV surveys.<sup>21 22</sup> Women in West Bhutan were less likely to be HPV positive than their  
17  
18 240 counterparts in the east of the country and this finding is likely to reflect differences in lifestyle  
19  
20 241 sexual habits across rural communities or ethnic groups. In fact, the percentage of women who  
21  
22 242 reported two or more sexual partners was 15% in the West versus 26% in the East.  
23  
24  
25  
26

27 243 The main strengths of the present study are the inclusion of a large number of women  
28  
29 244 from many rural villages and the relatively high and accurately estimated participation of invited  
30  
31 245 30–60 year-old women. We developed an mHealth platform and relied on the local mobile data  
32  
33 246 network to ensure a timely and effective coordination of BHU HWs and mobile study teams  
34  
35 247 across Bhutan, and to manage data collection, transmission, and real-time quality controls.<sup>23 24</sup>  
36  
37 248 Furthermore, virtually all study participants had access to at least one mobile phone, greatly  
38  
39 249 simplifying their recall for follow-up visits.  
40  
41  
42

43 250 However, study implementation was also characterised by logistic and technological  
44  
45 251 challenges. For example, although the central laboratory in Thimphu was able to deliver  
46  
47 252 *careHPV* results to each BHU in a median of 11 days after screening, the *careHPV* platform  
48  
49 253 turned out to be less reliable than expected and, even after completion of the initial training  
50  
51 254 period, there still continued to be substantial wastage due to invalid *careHPV* runs. In addition,  
52  
53 255 the original plan of rapidly recalling women and offering them colposcopy triage and, if  
54  
55  
56  
57  
58  
59  
60

1  
2  
3 256 necessary, cryotherapy in each BHU was hindered by difficulties in transport and/or malfunction  
4  
5  
6 257 of cryotherapy equipment.

7  
8 258 At end March 2017, 248 (94%) *care*HPV positive women had had a follow up visit and  
9  
10 259 217 had undergone either cryotherapy (n=88) or loop electrosurgical excision procedure (LEEP,  
11  
12 260 n=129). Histological ascertainment of cervical specimens from these women (as well as from a  
13  
14  
15 261 subset of *care*-HPV negative women) is still ongoing, and clinical outcomes will be the subject  
16  
17 262 of a future publication.

## 19 263 **CONCLUSION**

20  
21  
22 264 The “REACH-Bhutan” study shows both the readiness of the Bhutanese Health System,  
23  
24 265 and the willingness and resilience of Bhutanese women, to comply with cervical cancer  
25  
26  
27 266 screening algorithms based on self-collection for HPV testing. It also highlights, however, the  
28  
29 267 need to find new solutions to specific challenges, such as bringing self-collection even closer to  
30  
31 268 women, especially older ones living in the remotest areas, possibly in coordination with the  
32  
33 269 decentralized offer of other primary health care activities, e.g., child vaccination, which are  
34  
35  
36 270 regularly brought from BHUs to villages.

37  
38  
39 271

40  
41 272

42  
43  
44 273

45  
46 274  
47  
48  
49  
50  
51  
52  
53  
54  
55  
56  
57  
58  
59  
60

1  
2  
3 275 **Acknowledgements**  
4

5 276 All authors thank participating women and acknowledge the excellent fieldwork  
6  
7  
8 277 performed by doctors and health-care workers in Bhutan. We also thank Mr Damien Georges for  
9  
10 278 technical assistance.  
11

12  
13 279 **Contributors**  
14

15 280 IB, ST, SF, GC, and UT conceived and designed the study. IB, SF, GC, and UT drafted  
16  
17 281 the manuscript. ST, TC, FL, VT, and MP critically revised the manuscript. All authors  
18  
19 282 substantially contributed to the acquisition, analysis, and interpretation of data and approved the  
20  
21 283 final manuscript.  
22  
23

24 284 **Funding**  
25

26  
27 285 This work was supported by the Bill & Melinda Gates Foundation (grant number  
28  
29 286 OPP1053353).  
30  
31

32 287 **Disclaimer**  
33

34 288 The funders had no role in study design, data collection and analysis, decision to publish  
35  
36 289 or in the preparation of the manuscript.  
37  
38

39 290 **Competing interests**  
40

41 291 None declared.  
42  
43

44 292 **Ethics approval**  
45

46 293 The present study had the approval of both the Research Ethical Board of the Bhutan  
47  
48 294 Ministry of Health and the IARC Ethics Committee.  
49  
50

51 295 **Provenance and peer review**  
52

53 296 Not commissioned; externally peer reviewed.  
54  
55

56 297 **Data sharing statement**  
57  
58  
59  
60

1  
2  
3  
4  
5  
6  
7  
8  
9  
10  
11  
12  
13  
14  
15  
16  
17  
18  
19  
20  
21  
22  
23  
24  
25  
26  
27  
28  
29  
30  
31  
32  
33  
34  
35  
36  
37  
38  
39  
40  
41  
42  
43  
44  
45  
46  
47  
48  
49  
50  
51  
52  
53  
54  
55  
56  
57  
58  
59  
60

298 No additional data are available.

For peer review only

299 **References**

- 300 1. Ervik M, Lam F, Ferlay J, et al. Cancer Today Lyon, France: International Agency for  
301 Research on Cancer. 2016 [Available from: <http://gco.iarc.fr/today> accessed 11  
302 November 2016].
- 303 2. Dhendup T, Tshering P. Cervical cancer knowledge and screening behaviors among female  
304 university graduates of year 2012 attending national graduate orientation program,  
305 Bhutan. *BMC Womens Health* 2014;14(1):44.
- 306 3. Dorji T, Tshomo U, Phuntsho S, et al. Introduction of a National HPV vaccination program  
307 into Bhutan. *Vaccine* 2015;33(31):3726-30. doi: 10.1016/j.vaccine.2015.05.078
- 308 4. Ministry of Health. National Health Survey. Thimphu, Bhutan: Ministry of Health 2012.
- 309 5. Baussano I, Tshomo U, Clifford GM, et al. Cervical cancer screening program in Thimphu,  
310 Bhutan: population coverage and characteristics associated with screening attendance.  
311 *Bmc Womens Health* 2014;14:147. doi: 10.1186/s12905-014-0147-0
- 312 6. The World Bank. Rural population (% of total population). [Available from:  
313 <http://data.worldbank.org/indicator/SP.RUR.TOTL.ZS?locations=BT> accessed 11  
314 January 2017].
- 315 7. Arbyn M, Anttila A, Jordan J, et al. European Guidelines for Quality Assurance in Cervical  
316 Cancer Screening. Second edition--summary document. *Ann Oncol* 2010;21(3):448-58.  
317 doi: 10.1093/annonc/mdp471
- 318 8. Ronco G, Dillner J, Elfstrom KM, et al. Efficacy of HPV-based screening for prevention of  
319 invasive cervical cancer: follow-up of four European randomised controlled trials. *Lancet*  
320 2014;383(9916):524-32. doi: 10.1016/S0140-6736(13)62218-7

- 1  
2  
3 321 9. Arrossi S, Thouyaret L, Herrero R, et al. Effect of self-collection of HPV DNA offered by  
4  
5 322 community health workers at home visits on uptake of screening for cervical cancer (the  
6  
7 323 EMA study): a population-based cluster-randomised trial. *Lancet Glob Health*  
8  
9 324 2015;3(2):e85-94. doi: 10.1016/S2214-109X(14)70354-7  
10  
11  
12 325 10. Tsu V, Jeronimo J. Saving the World's Women from Cervical Cancer. *N Engl J Med*  
13  
14 326 2016;374(26):2509-11. doi: 10.1056/NEJMp1604113  
15  
16  
17 327 11. Qiao YL, Sellors JW, Eder PS, et al. A new HPV-DNA test for cervical-cancer screening in  
18  
19 328 developing regions: a cross-sectional study of clinical accuracy in rural China. *Lancet*  
20  
21 329 *Oncol* 2008;9(10):929-36. doi: 10.1016/S1470-2045(08)70210-9  
22  
23  
24 330 12. Qiao YL, Sellors JW, Eder PS, et al. A new HPV-DNA test for cervical-cancer screening in  
25  
26 331 developing regions: a cross-sectional study of clinical accuracy in rural China. *Lancet*  
27  
28 332 *Oncol* 2008;9(10):929-36.  
29  
30  
31 333 13. Tuerxun G, Yukejaier A, Lu L, et al. Evaluation of careHPV, Cervista Human  
32  
33 334 Papillomavirus, and Hybrid Capture 2 Methods in Diagnosing Cervical Intraepithelial  
34  
35 335 Neoplasia Grade 2+ in Xinjiang Uyghur Women. *Oncologist* 2016;21(7):825-31. doi:  
36  
37 336 10.1634/theoncologist.2015-0447 [published Online First: 2016/06/19]  
38  
39  
40 337 14. Labani S, Asthana S. Age-specific performance of careHPV versus Papanicolaou and visual  
41  
42 338 inspection of cervix with acetic acid testing in a primary cervical cancer screening. *J*  
43  
44 339 *Epidemiol Community Health* 2016;70(1):72-7. doi: 10.1136/jech-2015-205851  
45  
46 340 [published Online First: 2015/08/08]  
47  
48  
49 341 15. Obiri-Yeboah D, Adu-Sarkodie Y, Djigma F, et al. Options in human papillomavirus (HPV)  
50  
51 342 detection for cervical cancer screening: comparison between full genotyping and a rapid  
52  
53  
54  
55  
56  
57  
58  
59  
60



- 1  
2  
3 343 qualitative HPV-DNA assay in Ghana. *Gynecologic oncology research and practice*  
4  
5 344 2017;4:5. doi: 10.1186/s40661-017-0041-1 [published Online First: 2017/03/09]  
6  
7  
8 345 16. Segondy M, Kelly H, Magooa MP, et al. Performance of careHPV for detecting high-grade  
9  
10 346 cervical intraepithelial neoplasia among women living with HIV-1 in Burkina Faso and  
11  
12 347 South Africa: HARP study. *Br J Cancer* 2016;115(4):425-30. doi: 10.1038/bjc.2016.207  
13  
14 348 [published Online First: 2016/07/20]  
15  
16  
17 349 17. Bansil P, Lim J, Byamugisha J, et al. Performance of Cervical Cancer Screening Techniques  
18  
19 350 in HIV-Infected Women in Uganda. *J Low Genit Tract Dis* 2015;19(3):215-9. doi:  
20  
21 351 10.1097/lgt.0000000000000090 [published Online First: 2015/01/01]  
22  
23  
24 352 18. Lorenzi AT, Fregnani JH, Possati-Resende JC, et al. Can the careHPV test performed in  
25  
26 353 mobile units replace cytology for screening in rural and remote areas? *Cancer Cytopathol*  
27  
28 354 2016;124(8):581-8. doi: 10.1002/cncy.21718 [published Online First: 2016/04/14]  
29  
30  
31 355 19. Maza M, Alfaro K, Garai J, et al. Cervical cancer prevention in El Salvador (CAPE)-An  
32  
33 356 HPV testing-based demonstration project: Changing the secondary prevention paradigm  
34  
35 357 in a lower middle-income country. *Gynecologic oncology reports* 2017;20:58-61. doi:  
36  
37 358 10.1016/j.gore.2017.02.011 [published Online First: 2017/03/25]  
38  
39  
40 359 20. Tshomo U, Franceschi S, Dorji D, et al. Human papillomavirus infection in Bhutan at the  
41  
42 360 moment of implementation of a national HPV vaccination programme. *BMC Infect Dis*  
43  
44 361 2014;14:408. doi: 10.1186/1471-2334-14-408  
45  
46  
47  
48 362 21. Vaccarella S, Franceschi S, Herrero R, et al. Sexual behavior, condom use, and human  
49  
50 363 papillomavirus: pooled analysis of the IARC human papillomavirus prevalence surveys.  
51  
52 364 *Cancer Epidemiol Biomarkers Prev* 2006;15(2):326-33. doi: 10.1158/1055-9965.EPI-05-  
53  
54 365 0577  
55  
56  
57  
58  
59  
60

- 1  
2  
3 366 22. Vaccarella S, Herrero R, Dai M, et al. Reproductive factors, oral contraceptive use, and  
4  
5  
6 367 human papillomavirus infection: pooled analysis of the IARC HPV prevalence surveys.  
7  
8 368 *Cancer Epidemiol Biomarkers Prev* 2006;15(11):2148-53. doi: 10.1158/1055-9965.EPI-  
9  
10 369 06-0556  
11  
12 370 23. Hall CS, Fottrell E, Wilkinson S, et al. Assessing the impact of mHealth interventions in low-  
13  
14 371 and middle-income countries--what has been shown to work? *Glob Health Action*  
15  
16 372 2014;7:25606. doi: 10.3402/gha.v7.25606  
17  
18 373 24. Howitt P, Darzi A, Yang GZ, et al. Technologies for global health. *Lancet*  
19  
20 374 2012;380(9840):507-35. doi: 10.1016/S0140-6736(12)61127-1  
21  
22  
23  
24  
25 375  
26  
27 376  
28  
29  
30  
31  
32  
33  
34  
35  
36  
37  
38  
39  
40  
41  
42  
43  
44  
45  
46  
47  
48  
49  
50  
51  
52  
53  
54  
55  
56  
57  
58  
59  
60

377 **Table 1: Prevalence ratios (PR) for lack of previous cervical cancer screening and**  
 378 **corresponding 95% confidence intervals (CI) according to selected characteristics, Bhutan,**  
 379 **2016**

| Characteristic                                             | N tested | Never screened<br>N (%) | Adjusted<br>PR* | 95% CI    |
|------------------------------------------------------------|----------|-------------------------|-----------------|-----------|
| <b>Age (years)</b>                                         |          |                         |                 |           |
| 30–39                                                      | 1139     | 497 (43.6)              | 1               | –         |
| 40–49                                                      | 818      | 407 (49.8)              | 1.14            | 1.05–1.24 |
| ≥50                                                        | 633      | 383 (60.5)              | 1.36            | 1.26–1.47 |
| $\chi^2_1$ for trend                                       |          |                         | <i>p</i> <0.001 |           |
| <b>Region</b>                                              |          |                         |                 |           |
| East                                                       | 1500     | 625 (41.7)              | 1               | –         |
| West                                                       | 1090     | 662 (60.7)              | 2.84            | 2.05–3.95 |
| <b>Travel time from village to BHU (hours)<sup>†</sup></b> |          |                         |                 |           |
| <1                                                         | 656      | 285 (43.5)              | 1               | –         |
| 1–5                                                        | 1287     | 576 (44.8)              | 1.01            | 0.91–1.12 |
| Missing                                                    | 6        | 4 (66.7)                | –               | –         |
| ≥6–                                                        | 641      | 422 (65.8)              | 1.53            | 1.38–1.69 |
| $\chi^2_1$ for trend                                       |          |                         | <i>p</i> <0.001 |           |
| <b>Ethnicity<sup>†</sup></b>                               |          |                         |                 |           |
| Scharchop                                                  | 1435     | 615 (42.9)              | 1               | –         |
| Ngalop                                                     | 340      | 236 (69.4)              | 1.65            | 1.52–1.80 |
| Lhotsampa                                                  | 686      | 401 (58.5)              | 1.41            | 1.29–1.53 |
| Khengpa                                                    | 113      | 26 (23.0)               | 0.58            | 0.41–0.81 |
| Other                                                      | 16       | 9 (56.3)                | 1.49            | 0.97–2.31 |
| <b>Education level</b>                                     |          |                         |                 |           |
| Illiterate                                                 | 2372     | 1191 (50.2)             | 1               | –         |
| Literate                                                   | 218      | 96 (44.0)               | 0.85            | 0.73–0.99 |
| <b>Current occupation</b>                                  |          |                         |                 |           |
| Farmer/ housewife                                          | 2488     | 1254 (50.4)             | 1               | –         |
| Shopkeeper/saleswoman/manual worker                        | 53       | 12 (22.6)               | 0.56            | 0.34–0.90 |
| Clerical staff/teacher/health worker/nun                   | 49       | 21 (42.9)               | 0.97            | 0.72–1.31 |
| <b>Marital status<sup>†</sup></b>                          |          |                         |                 |           |
| Married/living as married                                  | 2390     | 1175 (49.2)             | 1               | –         |

|                                                            |      |             |      |                 |
|------------------------------------------------------------|------|-------------|------|-----------------|
| Never married                                              | 21   | 16 (76.2)   | 1.35 | 1.07–1.71       |
| Widow/separated/divorced                                   | 179  | 96 (53.6)   | 1.05 | 0.92–1.21       |
| <b>Number of pregnancies<sup>†</sup></b>                   |      |             |      |                 |
| 0                                                          | 67   | 43 (64.2)   | 1.25 | 1.05–1.49       |
| 1–2                                                        | 604  | 285 (47.2)  | 1.03 | 0.94–1.14       |
| ≥3                                                         | 1919 | 959 (50.0)  | 1    | –               |
| $\chi^2_1$ for trend                                       |      |             |      | <i>p</i> =0.057 |
| <b>Lifetime number of sexual partners</b>                  |      |             |      |                 |
| 0–1                                                        | 2020 | 983 (48.7)  | 1    | –               |
| 2                                                          | 341  | 166 (48.7)  | 0.97 | 0.88–1.08       |
| ≥3                                                         | 214  | 126 (58.9)  | 0.98 | 0.88–1.09       |
| Prefer not to answer                                       | 15   | 12 (80.0)   | –    | –               |
| $\chi^2_1$ for trend                                       |      |             |      | <i>p</i> =0.601 |
| <b>Age at first sexual intercourse (years)<sup>‡</sup></b> |      |             |      |                 |
| 9–14                                                       | 245  | 124 (50.6)  | 1    | –               |
| 15–16                                                      | 515  | 235 (45.6)  | 0.93 | 0.81–1.06       |
| 17–19                                                      | 968  | 452 (46.7)  | 1.00 | 0.89–1.12       |
| ≥20                                                        | 707  | 365 (51.6)  | 1.02 | 0.91–1.15       |
| Prefer not to answer / unknown                             | 143  | 101 (70.6)  | –    | –               |
| $\chi^2_1$ for trend                                       |      |             |      | <i>p</i> =0.151 |
| <b>HPV infection</b>                                       |      |             |      |                 |
| Negative                                                   | 2325 | 1168 (50.2) | 1    | –               |
| Positive                                                   | 265  | 119 (44.9)  | 1.01 | 0.91–1.13       |

380 CI=confidence interval; HPV=human papillomavirus; PR=prevalence ratio. \*Adjusted for age (3 classes: 30–39; 40–49; 50+) and  
 381 Basic Health Unit as appropriate. †Adjusted for age only – when adjusted for BHU, model does not converge. ‡Among sexually  
 382 active women.

383

384

385 **Table 2: Prevalence ratios (PR) for high-risk human papillomavirus (HPV) positivity and**  
 386 **corresponding 95% confidence intervals (CI) according to selected characteristics, Bhutan,**  
 387 **2016**

| Characteristic                           | N tested | care-HPV positive N (%) | Adjusted PR*   | 95% CI    |
|------------------------------------------|----------|-------------------------|----------------|-----------|
| <b>Age (years)</b>                       |          |                         |                |           |
| 30–39                                    | 1139     | 129 (11.3)              | 1              | –         |
| 40–49                                    | 818      | 76 (9.3)                | 0.80           | 0.62–1.05 |
| ≥50                                      | 633      | 60 (9.5)                | 0.79           | 0.59–1.05 |
| $\chi^2_1$ for trend                     |          |                         | <i>p=0.073</i> |           |
| <b>Region</b>                            |          |                         |                |           |
| East                                     | 1500     | 173 (11.5)              | 1              | –         |
| West                                     | 1090     | 92 (8.4)                | 0.55           | 0.30–1.00 |
| <b>Ethnicity</b>                         |          |                         |                |           |
| Scharchop                                | 1435     | 164 (11.4)              | 1              | –         |
| Ngalop                                   | 340      | 28 (8.2)                | 0.68           | 0.31–1.49 |
| Lhotsampa                                | 686      | 58 (8.5)                | 0.67           | 0.33–1.38 |
| Khengpa                                  | 113      | 15 (13.3)               | 1.80           | 0.31–10.5 |
| Other                                    | 16       | 0 (0)                   | –              | –         |
| <b>Education level</b>                   |          |                         |                |           |
| Illiterate                               | 2372     | 238 (10.0)              | 1              | –         |
| Literate                                 | 218      | 27 (12.4)               | 1.33           | 0.90–1.95 |
| <b>Current occupation</b>                |          |                         |                |           |
| Farmer/ housewife                        | 2488     | 253 (10.2)              | 1              | –         |
| Shopkeeper/saleswoman/manual worker      | 53       | 3 (5.7)                 | 0.56           | 0.18–1.68 |
| Clerical staff/teacher/health worker/nun | 49       | 9 (18.4)                | 1.65           | 0.90–3.01 |
| <b>Marital status</b>                    |          |                         |                |           |
| Married/living as married                | 2390     | 232 (9.7)               | 1              | –         |
| Never married                            | 21       | 3 (14.3)                | 1.53           | 0.54–4.38 |
| Widow/separated/divorced                 | 179      | 30 (16.8)               | 1.71           | 1.21–2.41 |
| <b>Number of pregnancies</b>             |          |                         |                |           |
| 0                                        | 67       | 8 (11.9)                | 1.29           | 0.66–2.49 |
| 1–2                                      | 604      | 83 (13.7)               | 1.49           | 1.15–1.93 |

|    |                                                 |      |            |           |           |
|----|-------------------------------------------------|------|------------|-----------|-----------|
| 1  |                                                 |      |            |           |           |
| 2  |                                                 |      |            |           |           |
| 3  | ≥3                                              | 1919 | 174 (9.1)  | 1         | –         |
| 4  | $\chi^2_1$ for trend                            |      |            | $p=0.007$ |           |
| 5  |                                                 |      |            |           |           |
| 6  |                                                 |      |            |           |           |
| 7  | <b>Lifetime number of sexual partners</b>       |      |            |           |           |
| 8  | 0–1                                             | 2020 | 198 (9.8)  | 1         | –         |
| 9  | 2                                               | 341  | 36 (10.6)  | 1.20      | 0.85–1.69 |
| 10 | ≥3                                              | 214  | 31 (14.5)  | 1.55      | 1.05–2.27 |
| 11 | Prefer not to answer                            | 15   | 0 (0.0)    | –         | –         |
| 12 | $\chi^2_1$ for trend                            |      |            | $p=0.022$ |           |
| 13 |                                                 |      |            |           |           |
| 14 |                                                 |      |            |           |           |
| 15 |                                                 |      |            |           |           |
| 16 | <b>Age at first sexual intercourse (years)†</b> |      |            |           |           |
| 17 | 9–14                                            | 245  | 21 (8.6)   | 1         | –         |
| 18 | 15–16                                           | 515  | 48 (9.3)   | 1.05      | 0.64–1.71 |
| 19 | 17–19                                           | 968  | 109 (11.3) | 1.20      | 0.76–1.89 |
| 20 | ≥20                                             | 707  | 72 (10.2)  | 1.11      | 0.69–1.79 |
| 21 | Prefer not to answer / unknown                  | 143  | 14 (9.8)   | –         | –         |
| 22 | $\chi^2_1$ for trend                            |      |            | $p=0.576$ |           |
| 23 |                                                 |      |            |           |           |
| 24 |                                                 |      |            |           |           |
| 25 |                                                 |      |            |           |           |
| 26 | <b>History of PAP smear (years)</b>             |      |            |           |           |
| 27 | Ever                                            | 1303 | 146 (11.2) | 1         | –         |
| 28 | Never                                           | 1287 | 119 (9.3)  | 1.06      | 0.81–1.39 |
| 29 |                                                 |      |            |           |           |

388 CI=confidence interval; HPV=human papillomavirus; PR=prevalence ratio.\*Adjusted for age (3 classes: 30–39; 40–49; 50+) and  
 389 Basic Health Unit as appropriate. †Among sexually active women.

390

1  
2  
3 391 **Figure Legends**  
4  
5  
6 392

7  
8 393 Figure 1: Map of Bhutan with study sites and predominant ethnic groups.\*  
9

10 394 \*The size of each dot is proportional to the size of the target population of each centre.  
11  
12 395

13  
14  
15 396 Figure 2: Participation (%) and corresponding 95% confidence intervals by Basic Health Unit,  
16  
17 397 region, and age group, Bhutan, 2016.  
18  
19 398

20  
21 399 Figure 3: Effect of travel time (on foot) on participation in REACH Bhutan, by age group,  
22  
23 400 Bhutan, 2016.  
24  
25 401

26  
27 402 Figure 4: Percent of A) lack of previous cervical cancer screening; and B) *care*-HPV positivity  
28  
29 403 by Basic Health Unit and overall in rural areas and in Thimphu, Bhutan, 2016.  
30  
31 404

32  
33  
34 \*women aged 30-60 years in Tshomo et al, 2014.  
35  
36  
37  
38  
39  
40  
41  
42  
43  
44  
45  
46  
47  
48  
49  
50  
51  
52  
53  
54  
55  
56  
57  
58  
59  
60

1  
2  
3  
4  
5  
6  
7  
8  
9  
10  
11  
12  
13  
14  
15  
16  
17  
18  
19  
20  
21  
22  
23  
24  
25  
26  
27  
28  
29  
30  
31  
32  
33  
34  
35  
36  
37  
38  
39  
40  
41  
42  
43  
44  
45  
46  
47  
48  
49  
50  
51  
52  
53  
54  
55  
56  
57  
58  
59  
60

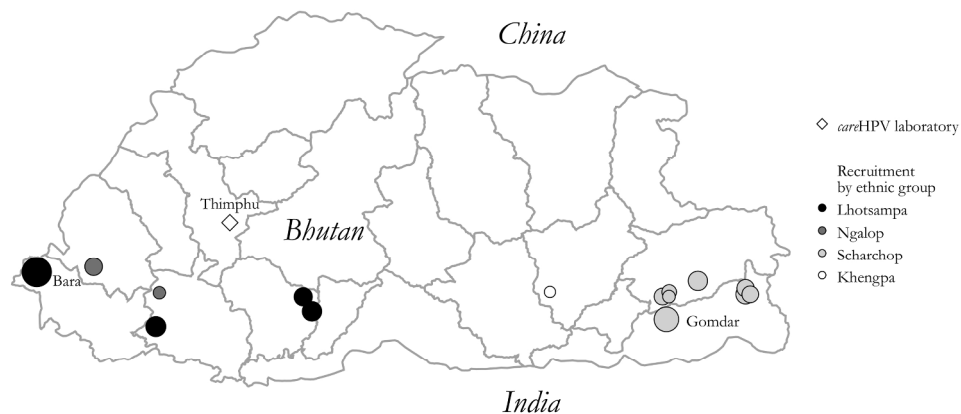

Figure 1: Map of Bhutan with study sites and predominant ethnic groups.\*  
The size of each dot is proportional to the size of the target population of each centre.

233x165mm (300 x 300 DPI)

Review only



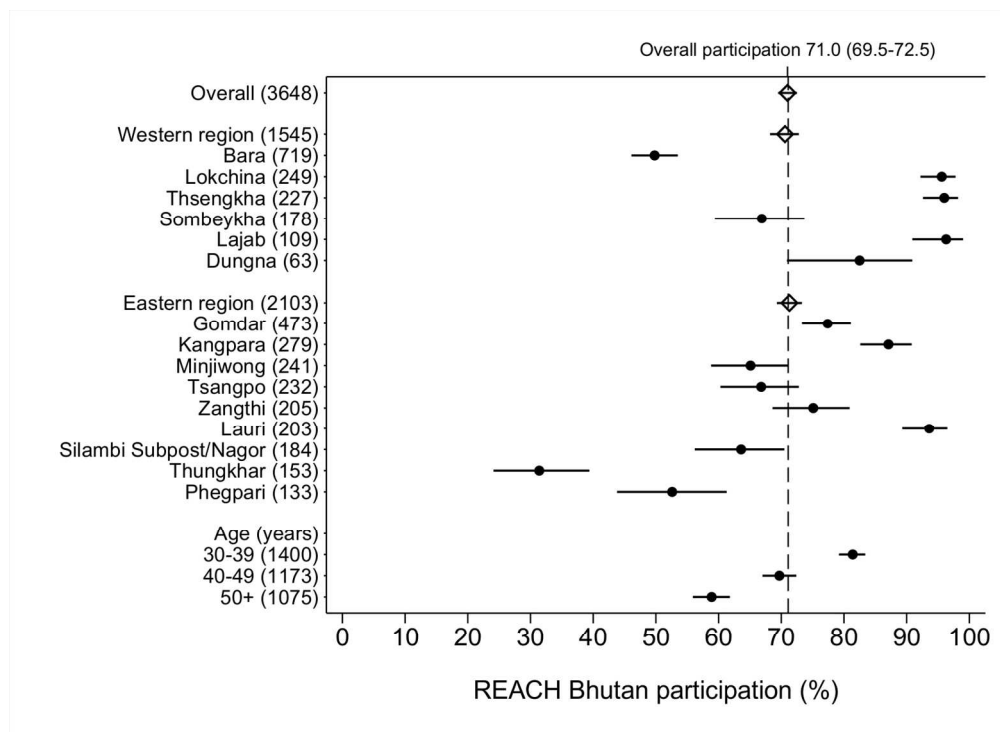

Figure 2: Participation (%) and corresponding 95% confidence intervals by Basic Health Unit, region, and age group, Bhutan, 2016.

139x101mm (300 x 300 DPI)

1  
2  
3  
4  
5  
6  
7  
8  
9  
10  
11  
12  
13  
14  
15  
16  
17  
18  
19  
20  
21  
22  
23  
24  
25  
26  
27  
28  
29  
30  
31  
32  
33  
34  
35  
36  
37  
38  
39  
40  
41  
42  
43  
44  
45  
46  
47  
48  
49  
50  
51  
52  
53  
54  
55  
56  
57  
58  
59  
60

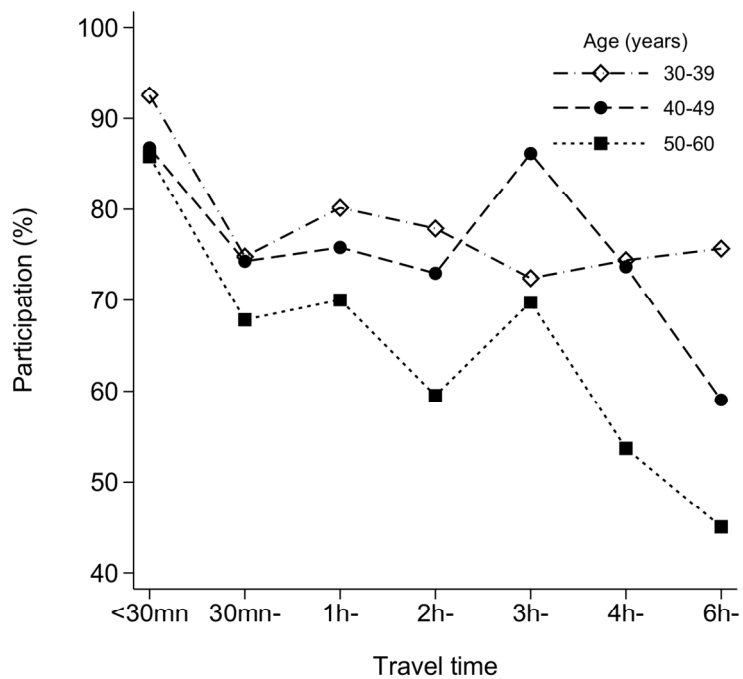

Figure 3: Effect of travel time (on foot) on participation in REACH Bhutan, by age group, Bhutan, 2016.

139x101mm (300 x 300 DPI)

ew only

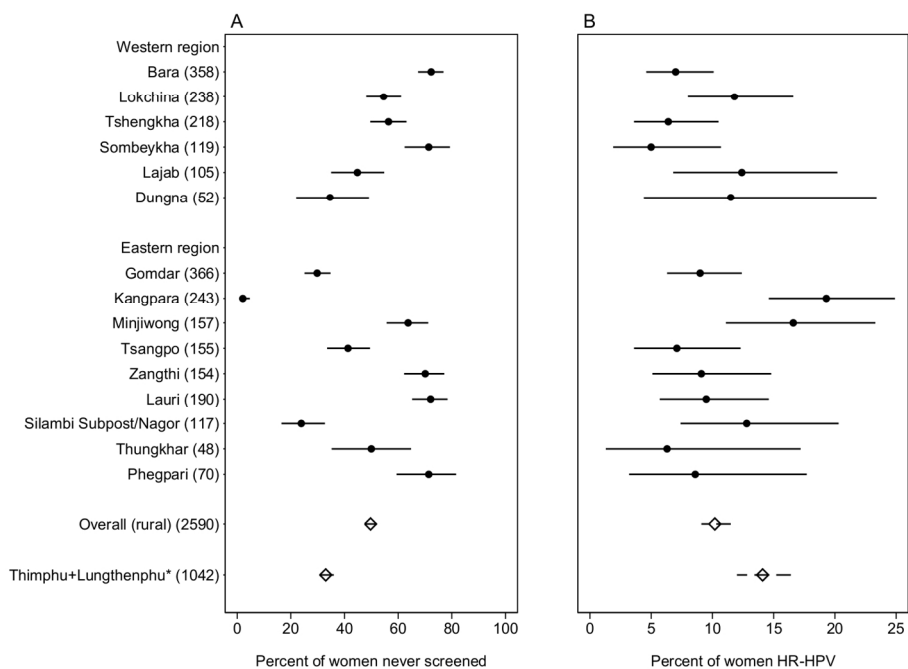

Figure 4: Percent of A) lack of previous cervical cancer screening; and B) care-HPV positivity by Basic Health Unit and overall in rural areas and in Thimphu, Bhutan, 2016.\*women aged 30-60 years in Tshomo et al 2014.

139x101mm (300 x 300 DPI)

Appendix Figure 1: Effect of travel time on participation (%) in REACH Bhutan, A) overall, B) by age group with 95% confidence interval, Bhutan, 2016

A

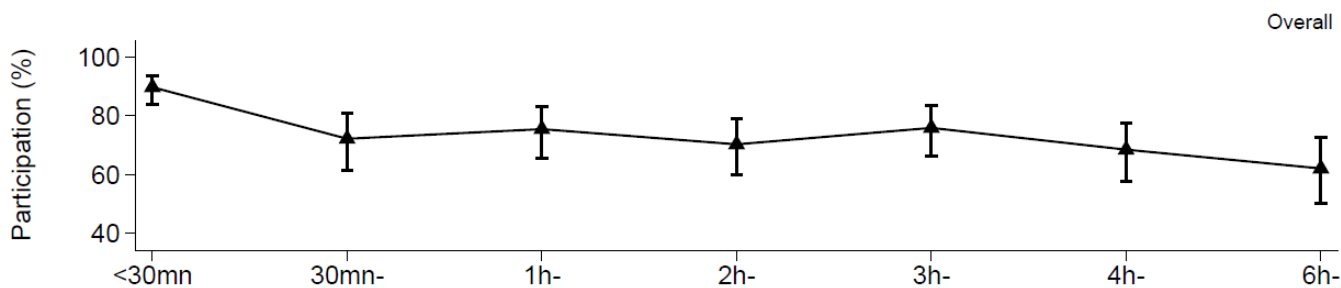

B

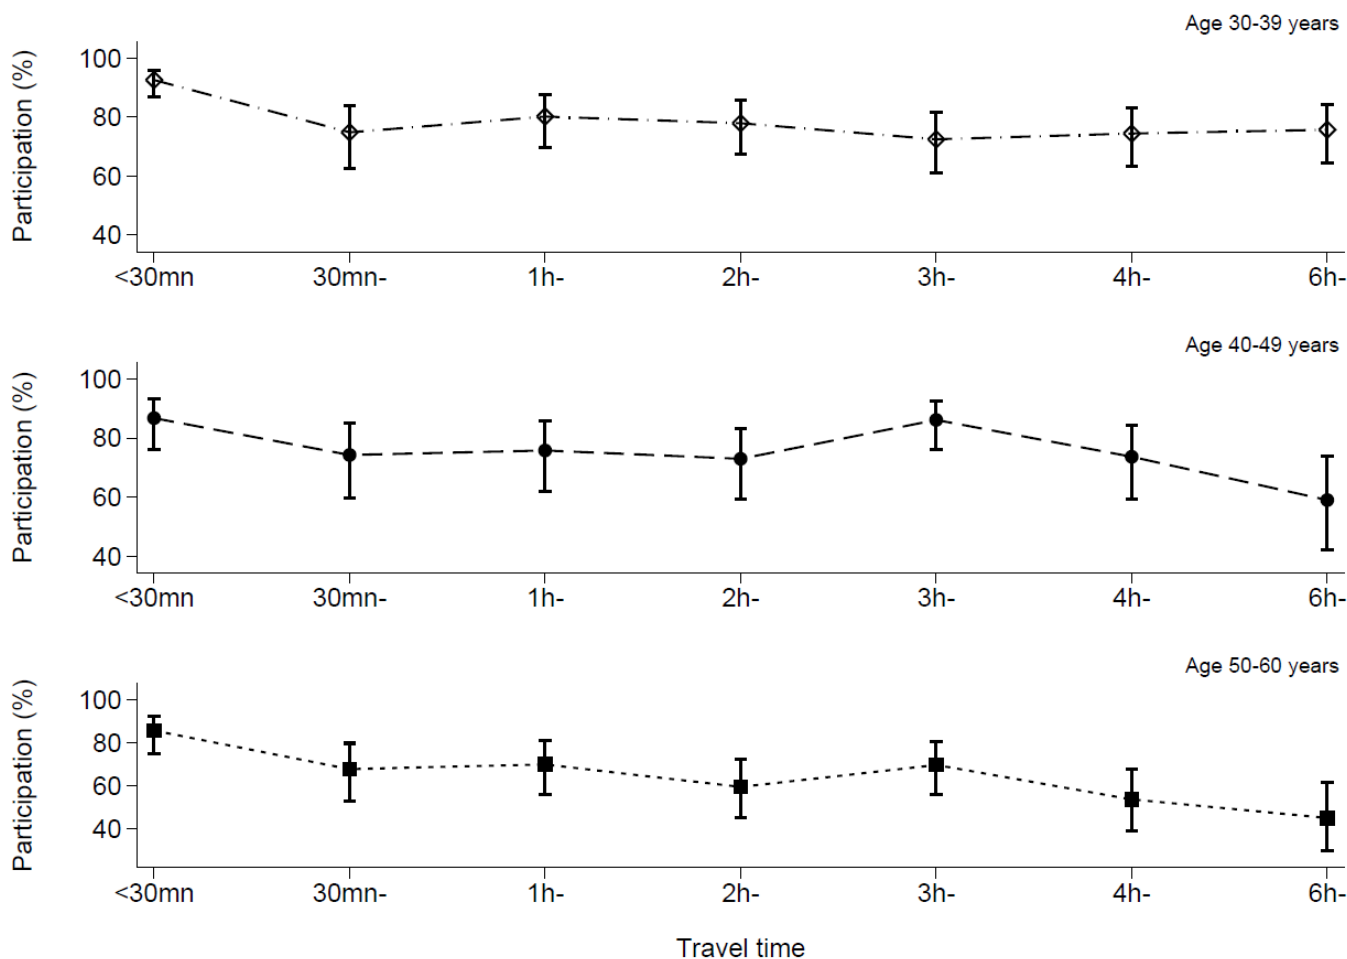

STROBE Statement—Checklist of items that should be included in reports of *cross-sectional studies*

|                           | Item No | Recommendation                                                                                                                                                                                    | Page                     |
|---------------------------|---------|---------------------------------------------------------------------------------------------------------------------------------------------------------------------------------------------------|--------------------------|
| <b>Title and abstract</b> | 1       | (a) Indicate the study's design with a commonly used term in the title or the abstract                                                                                                            | 1/3                      |
|                           |         | (b) Provide in the abstract an informative and balanced summary of what was done and what was found                                                                                               | 3                        |
| <b>Introduction</b>       |         |                                                                                                                                                                                                   |                          |
| Background/rationale      | 2       | Explain the scientific background and rationale for the investigation being reported                                                                                                              | 5                        |
| Objectives                | 3       | State specific objectives, including any prespecified hypotheses                                                                                                                                  | 5                        |
| <b>Methods</b>            |         |                                                                                                                                                                                                   |                          |
| Study design              | 4       | Present key elements of study design early in the paper                                                                                                                                           | 6                        |
| Setting                   | 5       | Describe the setting, locations, and relevant dates, including periods of recruitment, exposure, follow-up, and data collection                                                                   | 6                        |
| Participants              | 6       | (a) Give the eligibility criteria, and the sources and methods of selection of participants                                                                                                       | 6                        |
| Variables                 | 7       | Clearly define all outcomes, exposures, predictors, potential confounders, and effect modifiers. Give diagnostic criteria, if applicable                                                          | 7                        |
| Data sources/ measurement | 8*      | For each variable of interest, give sources of data and details of methods of assessment (measurement). Describe comparability of assessment methods if there is more than one group              | 7                        |
| Bias                      | 9       | Describe any efforts to address potential sources of bias                                                                                                                                         | 7                        |
| Study size                | 10      | Explain how the study size was arrived at                                                                                                                                                         | 6                        |
| Quantitative variables    | 11      | Explain how quantitative variables were handled in the analyses. If applicable, describe which groupings were chosen and why                                                                      | 7                        |
| Statistical methods       | 12      | (a) Describe all statistical methods, including those used to control for confounding                                                                                                             | 7                        |
|                           |         | (b) Describe any methods used to examine subgroups and interactions                                                                                                                               | 7                        |
|                           |         | (c) Explain how missing data were addressed                                                                                                                                                       | 8                        |
|                           |         | (d) If applicable, describe analytical methods taking account of sampling strategy                                                                                                                | 7                        |
|                           |         | (e) Describe any sensitivity analyses                                                                                                                                                             | NA                       |
| <b>Results</b>            |         |                                                                                                                                                                                                   |                          |
| Participants              | 13*     | (a) Report numbers of individuals at each stage of study—eg numbers potentially eligible, examined for eligibility, confirmed eligible, included in the study, completing follow-up, and analysed | 8                        |
|                           |         | (b) Give reasons for non-participation at each stage                                                                                                                                              | NA                       |
|                           |         | (c) Consider use of a flow diagram                                                                                                                                                                | Fig 2                    |
| Descriptive data          | 14*     | (a) Give characteristics of study participants (eg demographic, clinical, social) and information on exposures and potential confounders                                                          | 9; tables 1 & 2          |
|                           |         | (b) Indicate number of participants with missing data for each variable of interest                                                                                                               | 9, tables 1 & 2          |
| Outcome data              | 15*     | Report numbers of outcome events or summary measures                                                                                                                                              | 9, Figure 2,4 and Tables |
| Main results              | 16      | (a) Give unadjusted estimates and, if applicable, confounder-adjusted                                                                                                                             | 9                        |

|                          |    |                                                                                                                                                                            |              |
|--------------------------|----|----------------------------------------------------------------------------------------------------------------------------------------------------------------------------|--------------|
|                          |    | estimates and their precision (eg, 95% confidence interval). Make clear which confounders were adjusted for and why they were included                                     | Tables 1 & 2 |
|                          |    | (b) Report category boundaries when continuous variables were categorized                                                                                                  | Tables 1 & 2 |
|                          |    | (c) If relevant, consider translating estimates of relative risk into absolute risk for a meaningful time period                                                           | Figure 3     |
| Other analyses           | 17 | Report other analyses done—eg analyses of subgroups and interactions, and sensitivity analyses                                                                             | 8, Figure 3  |
| <b>Discussion</b>        |    |                                                                                                                                                                            |              |
| Key results              | 18 | Summarise key results with reference to study objectives                                                                                                                   | 10           |
| Limitations              | 19 | Discuss limitations of the study, taking into account sources of potential bias or imprecision. Discuss both direction and magnitude of any potential bias                 | 12           |
| Interpretation           | 20 | Give a cautious overall interpretation of results considering objectives, limitations, multiplicity of analyses, results from similar studies, and other relevant evidence | 12-13        |
| Generalisability         | 21 | Discuss the generalisability (external validity) of the study results                                                                                                      | 13           |
| <b>Other information</b> |    |                                                                                                                                                                            |              |
| Funding                  | 22 | Give the source of funding and the role of the funders for the present study and, if applicable, for the original study on which the present article is based              | 14           |

\*Give information separately for exposed and unexposed groups.

**Note:** An Explanation and Elaboration article discusses each checklist item and gives methodological background and published examples of transparent reporting. The STROBE checklist is best used in conjunction with this article (freely available on the Web sites of PLoS Medicine at <http://www.plosmedicine.org/>, Annals of Internal Medicine at <http://www.annals.org/>, and Epidemiology at <http://www.epidem.com/>). Information on the STROBE Initiative is available at [www.strobe-statement.org](http://www.strobe-statement.org).
