# Supplementary material for: Cervical cancer screening in rural Bhutan with the careHPV test on self-collected samples: an ongoing cross-sectional, population-based study (REACH-Bhutan)
Source: PubMed Central journal article supplement — BMJ Open. 2017 Jul 19;7(7):e016309. doi: 10.1136/bmjopen-2017-016309 (PMC5734451; doi:10.1136/bmjopen-2017-016309), 2017-07-19

**Appendix Figure 1: Effect of travel time on participation (%) in REACH Bhutan, A) overall, B) by age group with 95% confidence interval, Bhutan, 2016**

**A**

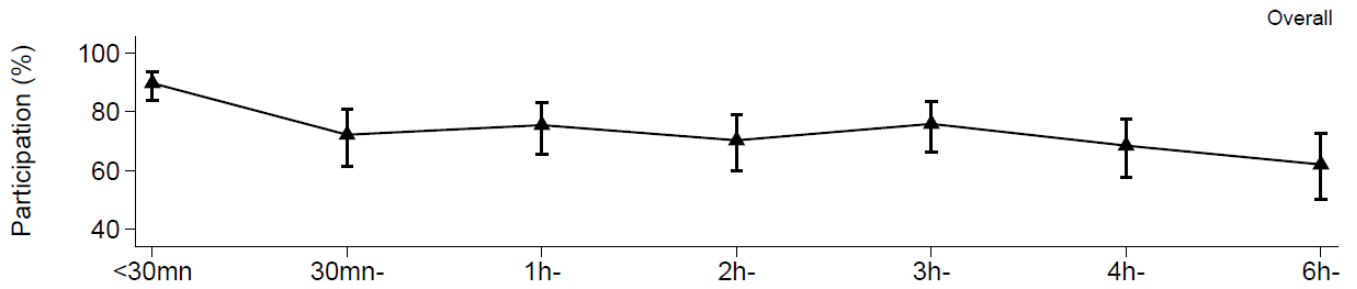

**B**

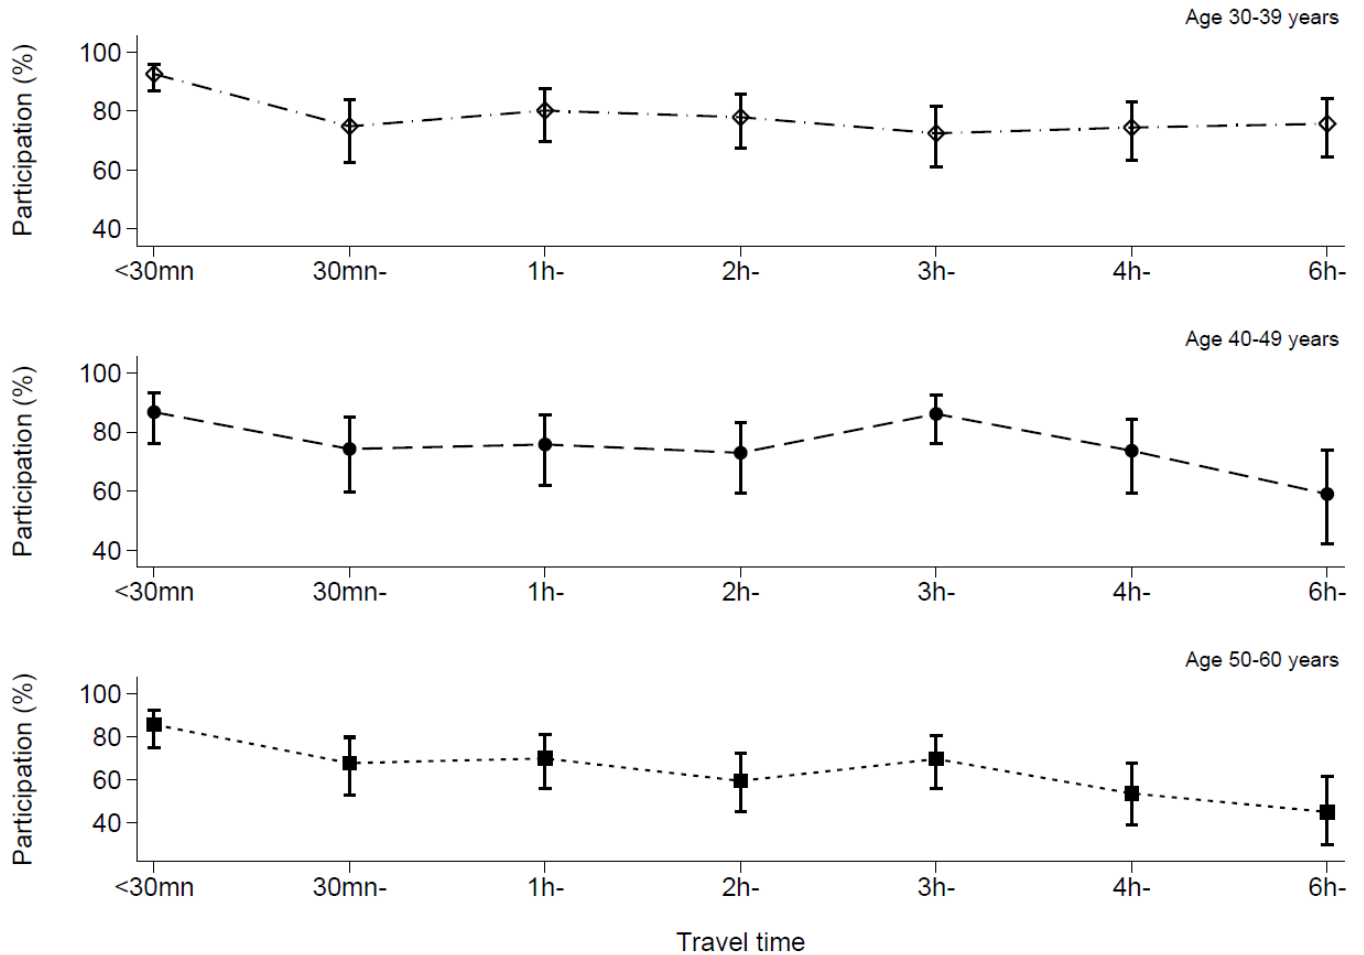

Supplement: bmjopen-2017-016309supp001.pdf [file bmjopen-2017-016309supp001.pdf]
